# Supplementary material
Source: PubMed Central journal article supplement (PMC5880694)
Supplement: NIHMS927899-supplement-supplement_1.pdf [file NIHMS927899-supplement-supplement_1.pdf]

## Supplementary Materials and Methods

### Preparation of JT801 analogues

Compounds were prepared according to the reported synthetic approach<sup>1</sup>. All chemicals were purchased from Sigma-Aldrich (St. Louis, MO, USA) or Thermo Fisher Scientific Inc. (Pittsburgh, PA, USA), unless otherwise specified. <sup>1</sup>H NMR spectra were recorded on Bruker DRX 400 MHz spectrometers (Billerica, MA, USA).

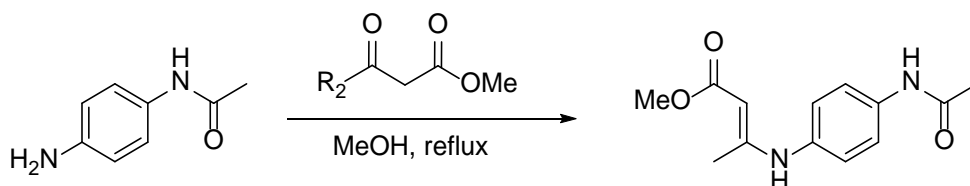

A total of 10 g methyl acetoacetate (88 mM) was added to the solution of 12 g (80 mM) 4-aminoacetanilide in 50 ml methanol, and the reaction mixture was refluxed overnight. 2 ml H<sub>2</sub>O was subsequently added and the reaction mixture was cooled to 0°C. Precipitate was then collected to give 15 g product as white crystals.

Yield 76%. <sup>1</sup>H NMR (400 MHz, DMSO) δ 10.22 (s, 1H, NH), 9.98 (s, 1H, NH), 7.57 (d, *J* = 6.8 Hz, 2H, CH), 7.12 (d, *J* = 6.8 Hz, 2H, CH), 4.67 (s, 1H, CH), 3.57 (s, 3H, OCH<sub>3</sub>), 2.04 (s, 3H, CH<sub>3</sub>), 1.95 (s, 3H, CH<sub>3</sub>).

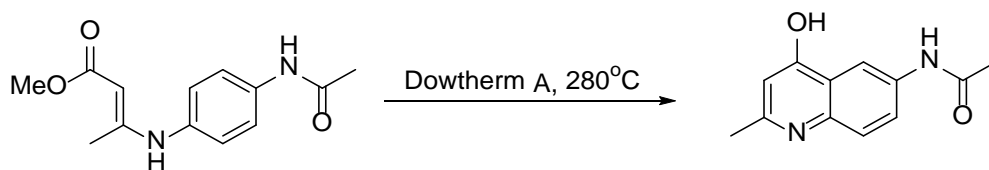

6g (24 mM) methyl 3-(4-acetylamino-phenylamino)crotonate was slowly added to the refluxed Dowtherm A via the top of the condenser. After 10 min, the reaction mixture was cooled down to room temperature. Precipitate was then filtered and washed with ethyl acetate followed by methanol to give 4 g product.

Yield 77%. <sup>1</sup>H NMR (400 MHz, DMSO) δ 11.53 (s, 1H, NH), 10.07 (s, 1H, OH), 8.24 (d, *J* = 2.4 Hz, 1H, CH), 7.84 (dd, *J* = 8.8, 2.4 Hz, 1H, CH), 7.44 (d, *J* = 8.8 Hz, 1H, CH), 5.85 (s, 1H, CH), 2.32 (s, 3H, CH<sub>3</sub>), 2.06 (s, 3H, CH<sub>3</sub>).

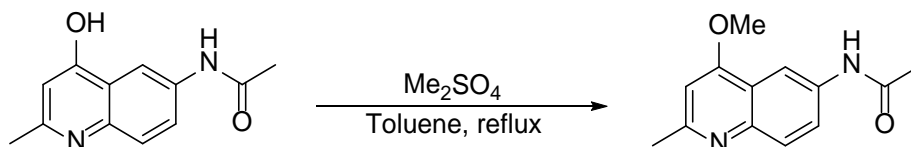

1.5 ml (16 mM) dimethyl sulfate dropwise was added to a suspension of 2g (9.3 mM)

6-acetamide-4-hydroxy-2-methylquinoline in toluene. The reaction mixture was refluxed for eight hours. Precipitate was filtered and redissolved in 40 ml H<sub>2</sub>O. The solution was basified with 0.25 ml 10N NaOH, and the precipitate was collected to give 0.8 g product.

Yield 38%. <sup>1</sup>H NMR (400 MHz, DMSO) δ 10.17 (s, 1H, NH), 8.46 (d, *J* = 2.4 Hz, 1H, CH), 7.78-7.72 (m, 2H, CH), 6.88 (s, 1H, CH), 4.01 (s, 3H, CH<sub>3</sub>), 2.57 (s, 3H, CH<sub>3</sub>), 2.09 (s, 3H, CH<sub>3</sub>).

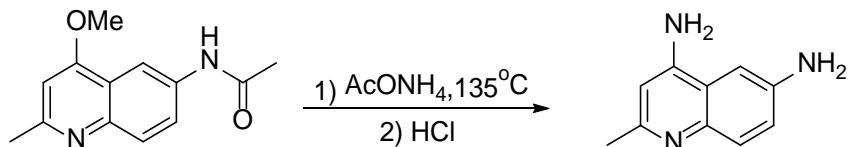

A mixture of 0.5 g (2.2 mM) 6-acetamide-4-methoxy-2-methylquinoline and 2.5 g (32 mM) ammonium acetate was heated at 135°C for four hours. 3 ml H<sub>2</sub>O and 4.5 ml 37% hydrochloric acid were then added to the reaction mixture, which was heated at 90°C for 5h. Upon cooling to 0°C, the precipitate was filtered and dissolved in 1ml hot water. The solution was basified with 1ml 10N NaOH at 0°C and the resulting precipitate was collected to give 170mg product.

Yield 36%. <sup>1</sup>H NMR (400 MHz, DMSO) δ 7.40 (d, *J* = 8.8 Hz, 1H, CH), 6.97 (dd, *J* = 8.8, 2.4 Hz, 1H, CH), 6.91 (d, *J* = 2.4 Hz, 1H, CH), 6.29 (s, 1H, CH), 6.01 (s, 2H, NH<sub>2</sub>), 5.03 (s, 2H, NH<sub>2</sub>), 2.31 (s, 3H, CH<sub>3</sub>).

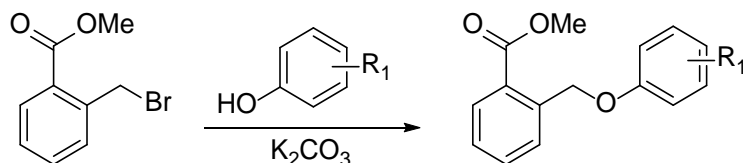

50 mM potassium carbonate (5equiv) was added to a solution of 10 mM 2-bromotoluate (1equiv) and 10 mM substituted phenol (1equiv) in 50 ml DMF. The reaction mixture was heated at 100°C for overnight. Precipitate was removed. Filtrate was then diluted with 200 ml water. The resulting precipitate was collected as the product.

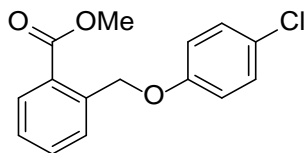

Yield 59%. <sup>1</sup>H NMR (400 MHz, CDCl<sub>3</sub>) δ 8.03 (d, *J* = 10.4 Hz, 1H, CH), 7.72 (d, *J* = 10.4 Hz, 1H, CH), 7.56 (t, *J* = 10 Hz, 1H, CH), 7.39 (t, *J* = 10 Hz, 1H, CH), 7.24 (d, *J* = 12 Hz, 2H, CH), 6.92 (d, *J* = 12 Hz, 2H, CH), 5.48 (s, 2H, CH<sub>2</sub>), 3.90 (s, 3H, OCH<sub>3</sub>).

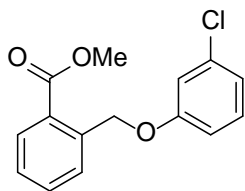

Yield 67%.  $^1\text{H NMR}$  (400 MHz,  $\text{CDCl}_3$ )  $\delta$  8.04 (d,  $J = 6.0$  Hz, 1H, CH), 7.72 (d,  $J = 6.0$  Hz, 1H, CH), 7.57 (t,  $J = 6.0$  Hz, 1H, CH), 7.39 (t,  $J = 6.0$  Hz, 1H, CH), 7.20 (t,  $J = 6.4$  Hz, 1H, CH), 7.01 (t,  $J = 1.6$  Hz, 1H, CH), 6.95 (dd,  $J = 6.4, 1.6$  Hz, 1H, CH), 6.88 (dd,  $J = 6.4, 1.6$  Hz, 1H, CH), 5.49 (s, 2H,  $\text{CH}_2$ ), 3.91 (s, 3H,  $\text{OCH}_3$ ).

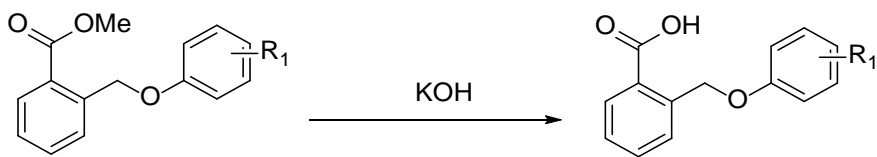

2 ml 4N aqueous sodium hydroxide was added to 3.3mmol substituted methyl 2-(benzyloxy) benzoate dissolved in a mixture of tetrahydrofuran (5 ml) and methanol (5 ml). The reaction mixture was refluxed overnight. Organic solvent was then removed and the aqueous portion was acidified with 2N HCl. Precipitate was collected as the product.

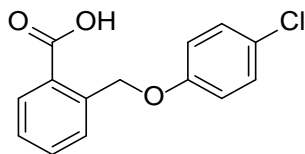

Yield 75%.  $^1\text{H NMR}$  (400 MHz,  $\text{CDCl}_3$ )  $\delta$  8.17 (d,  $J = 7.6$  Hz, 1H, CH), 7.77 (d,  $J = 7.6$  Hz, 1H, CH), 7.83 (t,  $J = 7.6$  Hz, 1H, CH), 7.44 (t,  $J = 7.6$  Hz, 1H, CH), 7.25 (d,  $J = 8.8$  Hz, 2H, CH), 6.93 (d,  $J = 8.8$  Hz, 2H, CH), 5.52 (s, 2H,  $\text{CH}_2$ ).

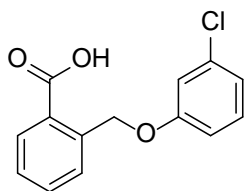

Yield 83%.  $^1\text{H NMR}$  (400 MHz,  $\text{CDCl}_3$ )  $\delta$  8.17 (d,  $J = 6.0$  Hz, 1H, CH), 7.77 (d,  $J = 6.0$  Hz, 1H, CH), 7.63 (t,  $J = 6.0$  Hz, 1H, CH), 7.44 (t,  $J = 6.0$  Hz, 1H, CH), 7.21 (t,  $J = 6.4$  Hz, 1H, CH), 7.02 (t,  $J = 1.6$  Hz, 1H, CH), 6.96 (dd,  $J = 6.4, 1.6$  Hz, 1H, CH), 6.89 (dd,  $J = 6.4, 1.6$  Hz, 1H, CH), 5.53 (s, 2H,  $\text{CH}_2$ ).

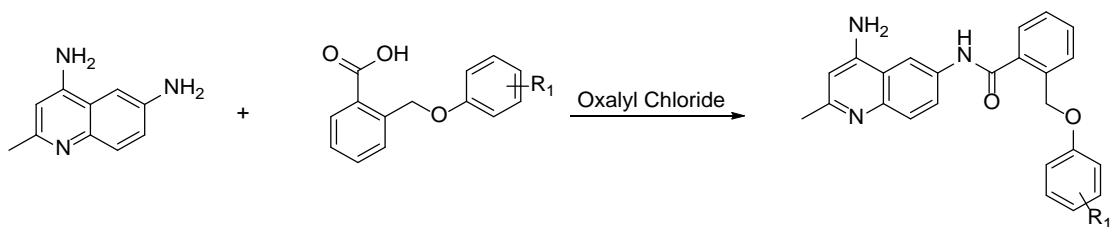

1.5mmol oxalyl chloride and a catalytic amount of dimethylformamide were added to 1 mM substituted 2-(phenoxy)methyl benzoic acid dissolved in 10 ml CHCl<sub>3</sub>. The reaction mixture was stirred at room temperature for 12 hours and concentrated under the vacuum. The residue was subsequently treated with 0.6 mM 2-methylquinoline-4,6 diamine dissolved in 10 ml pyridine and stirred for another three hours. The reaction mixture was then alkalinized with 10 ml 2N potassium hydroxide and extracted with 50 ml ethyl acetate. The organic layer was isolated and washed with 50 ml H<sub>2</sub>O followed by 50 ml brine and dried on the Na<sub>2</sub>SO<sub>4</sub>. Ethyl acetate was removed and the residue was purified by the column chromatography (methanol: dichloromethane = 1 : 10) to obtain the product.

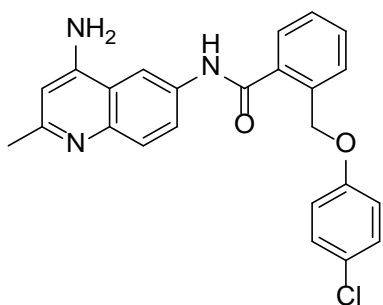

Yield 30%. <sup>1</sup>H NMR (400 MHz, DMSO) δ 10.84 (s, 1H, NH), 8.67 (s, 1H, CH), 8.42 (s, 2H, NH<sub>2</sub>), 7.92-7.87 (m, 2H, CH), 7.69 – 7.50 (m, 4H, CH), 7.26 (d, *J* = 7.2 Hz, 2H, CH), 6.96 (d, *J* = 7.2 Hz, 2H, CH), 6.58 (s, 1H, CH), 5.33 (s, 2H, CH<sub>2</sub>), 2.56 (s, 3H, CH<sub>3</sub>).

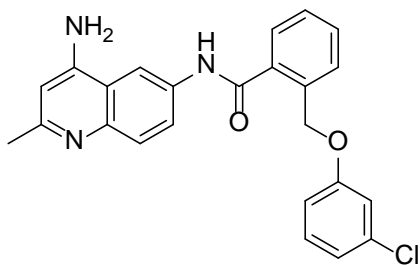

Yield 37%. <sup>1</sup>H NMR (400 MHz, DMSO) δ 10.67 (s, 1H, NH), 8.51 (s, 1H, CH), 7.78 – 7.51 (m, 6H, CH), 7.25 (t, *J* = 6.4 Hz, 1H, CH), 7.01 (s, 1H, CH), 6.96-6.91 (m, 2H, CH),

6.50 (s, 1H, CH), 5.36 (s, 2H, CH<sub>2</sub>), 2.47 (s, 3H, CH<sub>3</sub>).

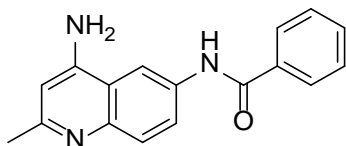

Yield 51%. <sup>1</sup>H NMR (400 MHz, DMSO) δ 10.42 (s, 1H, NH), 8.43 (d, *J* = 1.9 Hz, 1H, CH), 8.06 – 7.99 (m, 2H, CH), 7.77 (dd, *J* = 9.0, 2.1 Hz, 1H, CH), 7.68 (d, *J* = 9.0 Hz, 1H, CH), 7.64 – 7.52 (m, 3H, CH), 6.78 (s, 2H, NH<sub>2</sub>), 6.46 (s, 1H, CH), 2.42 (s, 3H, CH<sub>3</sub>).

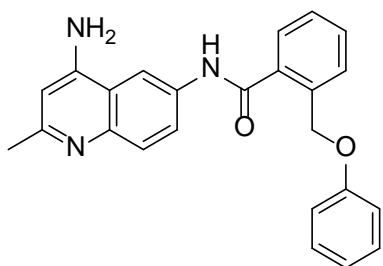

Yield 43%. <sup>1</sup>H NMR (400 MHz, DMSO) δ 10.57 (s, 1H, NH), 8.42 (s, 1H, CH), 7.72 – 7.63 (m, 4H, CH), 7.53 (dt, *J* = 15.0, 6.8 Hz, 2H, CH), 7.28 – 7.22 (m, 1H, CH), 6.94 (ddd, *J* = 20.7, 11.7, 4.1 Hz, 4H), 6.64 (s, 2H, NH<sub>2</sub>), 6.46 (s, 1H, CH), 5.34 (s, 2H, CH<sub>2</sub>), 2.42 (s, 3H, CH<sub>3</sub>).

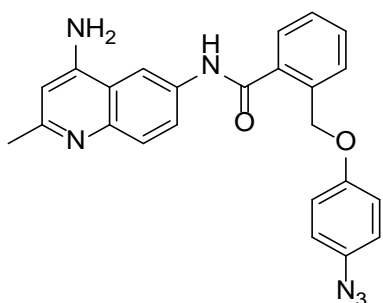

Yield 40%. <sup>1</sup>H NMR (400 MHz, DMSO) δ 10.57 (s, 1H, NH), 8.41 (s, 1H, CH), 7.67 (d, *J* = 8.1 Hz, 1H, CH), 7.61 (d, *J* = 8.9 Hz, 1H, CH), 7.52 (dd, *J* = 12.5, 7.6 Hz, 3H, CH), 7.47 – 7.34 (m, 1H, CH), 6.86 (s, 4H, CH), 6.39 (s, 1H, CH), 5.19 (s, 2H, CH<sub>2</sub>), 2.36 (s, 3H, CH<sub>3</sub>).

### ***pH measurement***

Intracellular pH was measured using pHrodo® Green AM Intracellular pH Indicator (Thermo Fisher Scientific Inc., Pittsburgh, PA, #P35373) in accordance with the

manufacturer's guidelines. pHrodo® Green AM Intracellular pH Indicator is a novel fluorogenic probe used to measure intracellular pH in live cells. This pHrodo® Green dye has been modified with AM ester groups, which results in an uncharged molecule that can permeate cell membranes. Once inside the cell, the lipophilic blocking groups are cleaved by nonspecific esterases, resulting in a compound that is retained within the intracellular space. Fluorescence intensity of the probe is then an indicator of intracellular pH. It is weakly fluorescent at neutral pH but increasingly fluorescent as the pH drops. This reagent can quantify cellular cytosolic pH in the range of 9-4 with a pKa of ~6.5 with excitation/emission of 509/533 nm. Subsequent use of the Intracellular pH Calibration Buffer Kit (#P35379) allows this intracellular pH to be quantified. Briefly, cells were washed with Live Cell Imaging Solution (LCIS), then 10 µl of pHrodo™ Red AM or pHrodo™ Green AM was mixed with 100 µl of PowerLoad™ concentrate and was added to 10 mL of LCIS. Cells were incubated with the pHrodo™ AM/PowerLoad™/LCIS at 37°C for 30 minutes and then were analyzed using the Cytation™ 5 Cell Imaging Multi-Mode Reader (BioTek, USA) using the 509/533 maxima. Extracellular pH was measured using pH meter (HI2221 Calibration Check pH/ORP meter, HANNA instrument, USA) in accordance with the manufacturer's guidelines.

### ***RNAi and gene transfection***

Human CA9 cDNA (#SC122585) was obtained from OriGene Technologies Inc. (Rockville, MD, USA). Human IKKβ shRNA (#TRCN0000018916 and #TRCN0000018917), human OPRL1 shRNA (#TRCN0000357699), human NRF2 shRNA (#TRCN0000007555), human OPRM1 shRNA (#TRCN0000009274), human CA9 shRNA (#TRCN0000150123 and #TRCN0000183853), and human RelA shRNA (#TRCN0000014683 and #TRCN0000014685) were obtained from Sigma-Aldrich (St. Louis, MO, USA). Transfection with shRNA or cDNA was performed with Lipofectamine 3000 (Invitrogen, Grand Island, NY, USA, #L3000-015) according to the manufacturer's instructions.

### ***Immunoprecipitation***

Cells were lysed at 4°C in ice-cold radioimmunoprecipitation assay buffer (Cell Signaling Technology, Danvers, MA, USA, #9806) and cell lysates were cleared by brief centrifugation (13,000 g, 15 min). Concentrations of proteins in the supernatant were determined using BCA assay (Thermo Fisher Scientific Inc., Pittsburgh, PA, #23225). Prior to immunoprecipitation, samples containing equal amounts of proteins were pre-cleared with protein A agarose beads (Santa Cruz Biotechnology, Dallas, Texas, USA, #sc-2027) (4°C, 3 h) and subsequently incubated with various irrelevant IgG or specific antibodies (5 µg/mL) in the presence of protein A agarose beads for 2 h or overnight at 4°C with gentle shaking. Following incubation, agarose beads were washed extensively with phosphate buffered saline and proteins were eluted by boiling in 2 × sodium dodecyl

sulfate sample buffer before sodium dodecyl sulfate polyacrylamide gel electrophoresis.

### ***Cell viability assay***

Cells were seeded into 96-well plates and incubated with the indicated treatments. Subsequently, 100 µl fresh medium was added to cells containing 10 µl Cell Counting Kit-8 (CCK-8) solutions (Dojindo Laboratories, Tokyo, Japan, #CK04) and incubated for two hours (37°C, 5% CO<sub>2</sub>). Absorbance at 450 nm was measured using a microplate reader (Cytation™ 5 Cell Imaging Multi-Mode Reader, BioTek, USA).

### ***Colony formation assay***

Long-term cell survival was monitored in a colony formation assay. In brief, 200 cells were reseeded into 24-well plates after treatment with JTC801 for 24 hours. The cells were allowed to grow for the next 12-14 days to allow colony formation and the colonies were visualized using crystal violet staining.

### ***Q-PCR analysis***

Total RNA was extracted and purified from cultured cells using the RNeasy Plus Mini Kit (QIAGEN, Valencia, CA, USA, #74136) according to the manufacturer's instructions. The RNA was quantified by determining absorbance at 260 nm. One µg of total RNA from each sample was reverse transcribed into cDNA using the iScript cDNA synthesis kit (Bio-Rad, Hercules, CA, USA, #170-8891) in a volume of 20 µl. cDNA from cell samples was amplified. Quantitative real time PCR was performed using ssoFast EvaGreen Supermix (Bio-Rad, Hercules, CA, USA, #172-5204) on the C1000 Touch Thermocycler CFX96 Real Time System (Bio-Rad, Hercules, CA, USA) according to the manufacturer's protocol. Analysis was performed using the Bio-Rad CFX Manager software (Bio-Rad, Hercules, CA, USA). The primers, which were synthesized and desalted from Sigma-Aldrich, are shown below: mouse CA9: 5'-GGCGAACGATTGAGGCTTCCTT -3' and 5'-GCTGGTGACAGCAAAGAGAAGG -3'; human CA9: 5'-GTGCCTATGAGCAGTTGCTGTC-3' and 5'-AAGTAGCGGCTGAAGTCAGAGG-3'; human CA2: 5'-GTGACCTGGATTGTGCTCAAGG -3' and 5'-GTTGTCCACCATCAGTTCTTCGG -3'; human CA12: 5'-GACCTTTATCCTGACGCCAGCA-3' and 5'-CATAGGACGGATTGAAGGAGCC-3'; human V-ATPaseA: 5'-CTGTTGCTGCTAGAGAAGCCTC -3' and 5'-GCAGGCATTTTCAGCTAAACGACC -3'; human V-ATPaseB: 5'-GTCTGCCTCTTCCTGAACTTGG-3' and 5'-CCGTCAGTATGACCAGCACATG-3'; human AE1: 5'-CTGCTGGTGTGTTGAGGAAGCCT -3' and 5'-CACCAGCAGGATGAGCCAGAAG -3'; human AE2: 5'-GACTTCCGAGATGCACTTGACC-3' and 5'-CCTATCAGGTCCTGCGTCTTCT-3'; human AE3: 5'-AGCCACACCAGCACTGACTATC-3' and 5'- GAACTCGCTGATGGCACTTAGG -

3'; human NBC1/2: 5'-GGAAAGCCAAGTCCTACCACGA-3' and 5'-TACCAGCAATCAGGTCGTGCCT-3'; human NDCBE: 5'-CATCGTGACAGCAGAAGTCCAC-3' and 5'-GCTTGAGAGGATGAAGGTGGTG-3'; human NHE1: 5'-GAACTGGACCTTCGTCATCAGC-3' and 5'-GGTCAGCTTACGATACGGAAC-3'; human MCT1: 5'-TTGTTGGTGGCTGCTTGTACAGG-3' and 5'-TCATGGTCAGAGCTGGATTCAAG-3'; human MCT2: 5'-TGCTGGCTGTTATGTACGCAGG-3' and 5'-GCCAACACCATTCCAAGACAGC-3'; human MCT3: 5'-TGCAGTTCGAGGTGCTCATGGC-3' and 5'-GTTCTTCAACACATCCACCAGGC-3'; human MCT4: 5'-GCCATCTTTGCTGGTGGTTACC-3' and 5'-TGGTCCAGAAAGGACAGCCATC-3'; human MCT4: 5'-GCCATCTTTGCTGGTGGTTACC-3' and 5'-TGGTCCAGAAAGGACAGCCATC-3'; mouse 18S RNA (5'-GCAATTATCCCCATGAACG-3' and 5'-GGCCTCACTAAACCATCCAA-3'); and human 18S RNA (5'-CTACCACATCCAAGGAAGCA-3' and 5'-TTTTTCGTCACCTCCCCG-3').

### ***Western blot***

Cells were lysed with 1X cell lysis buffer (Cell Signaling Technology, #9803) containing protease inhibitor on ice for 10 minutes, homogenized by passing through a 21-gauge needle, and centrifuged at 14,000 x g for 15 minutes at 4°C to pellet the cell debris. Protein was quantified using BCA assay (Thermo Fisher Scientific Inc., #23225) and 20 µg of each sample was resolved on 4%-12% Criterion XT Bis-Tris gels (Bio-Rad, Hercules, CA, USA, #3450124) in XT MES running buffer (Bio-Rad, #1610789) and transferred to PVDF membranes (pore size 0.22 µm, Bio-Rad, #1620233) using the Trans-Blot® Turbo™ Transfer Pack and System (Bio-Rad). Membranes were blocked with TBST containing 5 % skim milk for one hour and incubated overnight at 4°C with various primary antibodies. Following three washes in TBST, membranes were incubated with goat anti-rabbit/Mouse IgG HRP secondary antibody (1:3000, Cell Signaling Technology, #7074 or #7076) at room temperature for one hour and washed. Chemiluminescence substrate was applied using SuperSignal™ West Pico Chemiluminescent Substrate (Thermo Fisher Scientific Inc., #34080) or SuperSignal™ West Femto Maximum Sensitivity Substrate (Thermo Fisher Scientific Inc., #34095) and blots were analyzed using the ChemiDoc™ Touch Imaging System (Bio-Rad). Image Lab™ Software (Bio-Rad) was used for relative quantification of bands, normalized to total protein loaded in each lane.

### ***Image analysis***

For histological analysis, tissue specimens were fixed with 10% buffered formalin, dehydrated in ethanol, embedded with paraffin, and stained using the standard hematoxylin and eosin method. The fraction of preserved acinar area was calculated as



previously described <sup>2</sup>. Pancreatic ductal dysplasia was graded according to established criteria <sup>3</sup>. Histological images were acquired using an EVOS FL Auto Cell Imaging System (Thermo Fisher Scientific Inc.).

Immunofluorescent staining of mouse tissues was performed using antibodies directed against CA9 (Abcam, #ab184006), p-RelA (Cell Signaling Technology, #3033), and DAPI (Thermo Fisher Scientific Inc., #H3569). Immunofluorescent images were acquired using an AxioObserver Z1 Microscope with Apotome (Carl Zeiss). Quantifications of images were performed by assessing 20X high-power fields per slide and 20 fields per mouse (five mice/group) in a blinded manner.

Immunohistochemistry in human pancreatic cancer tissue array was performed using antibodies directed against CA9 (Cell Signaling Technology, #5649). This tissue microarray (#HPan-Ade180Sur-01) was purchased from US Biomax and included 90 cases of pancreatic cancer tumor. Antigen retrieval was carried out by heating the slides at 95 °C in 10 mM sodium citrate for 20 mins. Endogenous peroxidase was quenched by incubating the slides in 3% hydrogen peroxide solution for 10 min. Slides were stained using a 1:100 dilution of CA9 antibody and detected using the EnVision™+ Dual Link System-HRP (Dako, Carpinteria, CA, USA, #K4063) according to the manufacturer's protocol. Slides were counterstained in hematoxylin (Sigma-Aldrich, #MHS1). Images were captured using an Invitrogen EVOS FL Auto Cell Imaging System (Thermo Fisher Scientific Inc.) via built-in system software.

### ***Secrete-pair luminescence assay***

Dual-reporter promoter clones or controls were transfected into two cell lines in duplicates. PANC1 and MiaPaCa2 cells were transfected with pEZX-PG04-CA9-promoter-Gaussia luciferase (GLuc)/secreted alkaline phosphatase (SEAP) (GeneCopoeia, #MPRM23878-PG04). After 48 h, these cells were treated with JTC801 (10 µM) in the absence or presence of IMD0354 at indicated times. The CA9 promoter luciferase activity was measured with secrete-pair dual luminescence assay kit (GeneCopoeia, #SPDA-D010) in accordance with the manufacturer's guidelines.

### ***Biochemical assay***

Biochemical measurements of tissue enzymes (AMYL, BUN, and ALT) in serum were performed using the IDEXX Catalyst Dx® Chemistry Analyzer according to the manufacturer's protocol.

### ***Intracellular reactive oxygen species measurement***

The intracellular formation of reactive oxygen species was detected using the fluorescent probe CM-H2DCFDA (Molecular Probes, #C6827). In brief, cells ( $1 \times 10^5$ /ml) were incubated with CM-H2DCFDDA (10 µM) for 45 min at 37 °C and then measured using a microplate reader (Cytation™ 5 Cell Imaging Multi-Mode Reader,

BioTek, USA).

### ***Glutathione assay***

The relative GSH concentration in cell lysates was assessed using a kit from Sigma-Aldrich (#CS0260) according to the manufacturer's instructions. The measurement of GSH used a kinetic assay in which catalytic amounts (nmoles) of GSH caused a continuous reduction of 5,5'-dithiobis (2-nitrobenzoic acid) to 5-thio-2-nitrobenzoic acid and the GSSG formed was recycled by glutathione reductase and NADPH. The reaction rate was proportional to the concentration of glutathione up to 2 mM. The yellow product (5-thio-2-nitrobenzoic acid) was measured spectrophotometrically at 412 nm using a microplate reader (Cytation™ 5 Cell Imaging Multi-Mode Reader, BioTek, USA).

### ***Glutathione disulfide assay***

The relative GSSG concentration in cell lysates was assessed using a kit from Cayman (#703002) according to the manufacturer's instructions. The quantification of GSSG, exclusive of GSH, was accomplished by first derivatizing GSH with 2-vinylpyridine. In brief, 1 µl of 1 M 2-vinylpyridine in absolute ethanol were added to 99 µl of cell homogenate. This suspension was incubated at room temperature for 60 minutes to block the thiol group of the GSH already present. NADPH (95 µl of 2 mg/ml) in nanopure water and 5 µl of 2 units/ml glutathione reductase were added to reduce GSSG.

### ***JTC801 metabolism and disposition***

Serum samples were prepared by mixing 30 µL of serum with 70 µL of methanol, followed by vortexing for 30s and centrifugation at 15,000 g for 10 min. Liver, kidney, and pancreas samples were homogenized in water (100 mg of liver in 500 µl of water) on ice. Two hundred µl of acetonitrile:methanol (1:1, v/v) was added to 100 µl of each homogenate and followed by vortexing and centrifugation at 15,000 g for 10 min. The supernatant was transferred to a new Eppendorf vial for a second centrifugation (15,000 g for 10 min). Each supernatant was transferred to an autosampler vial and 1.0 µl was injected into time-of-flight mass spectrometry (UPLC-TOFMS) (Waters, Milford, MA) for metabolite analysis.

### ***Statistical analysis***

Data are presented as mean ± s.e.m. Unpaired Student's t tests were used to compare the means of two groups. One-way Analysis of Variance (ANOVA) was used for comparison among the different groups. When ANOVA was significant, *post hoc* testing of differences between groups was performed using the Least Significant Difference (LSD) test. The Kaplan-Meier method was used to compare differences in mortality rates between groups. A p-value < 0.05 was considered statistically significant.

## References

1. Shinkai H, Ito T, Iida T, et al. 4-Aminoquinolines: Novel Nociceptin Antagonists with Analgesic Activity. *Journal of Medicinal Chemistry* 2000;43:4667-4677.
2. Ochi A, Nguyen AH, Bedrosian AS, et al. MyD88 inhibition amplifies dendritic cell capacity to promote pancreatic carcinogenesis via Th2 cells. *J Exp Med* 2012;209:1671-87.
3. Hruban RH, Adsay NV, Albores-Saavedra J, et al. Pancreatic intraepithelial neoplasia: a new nomenclature and classification system for pancreatic duct lesions. *Am J Surg Pathol* 2001;25:579-86.

# Supplementary Figures

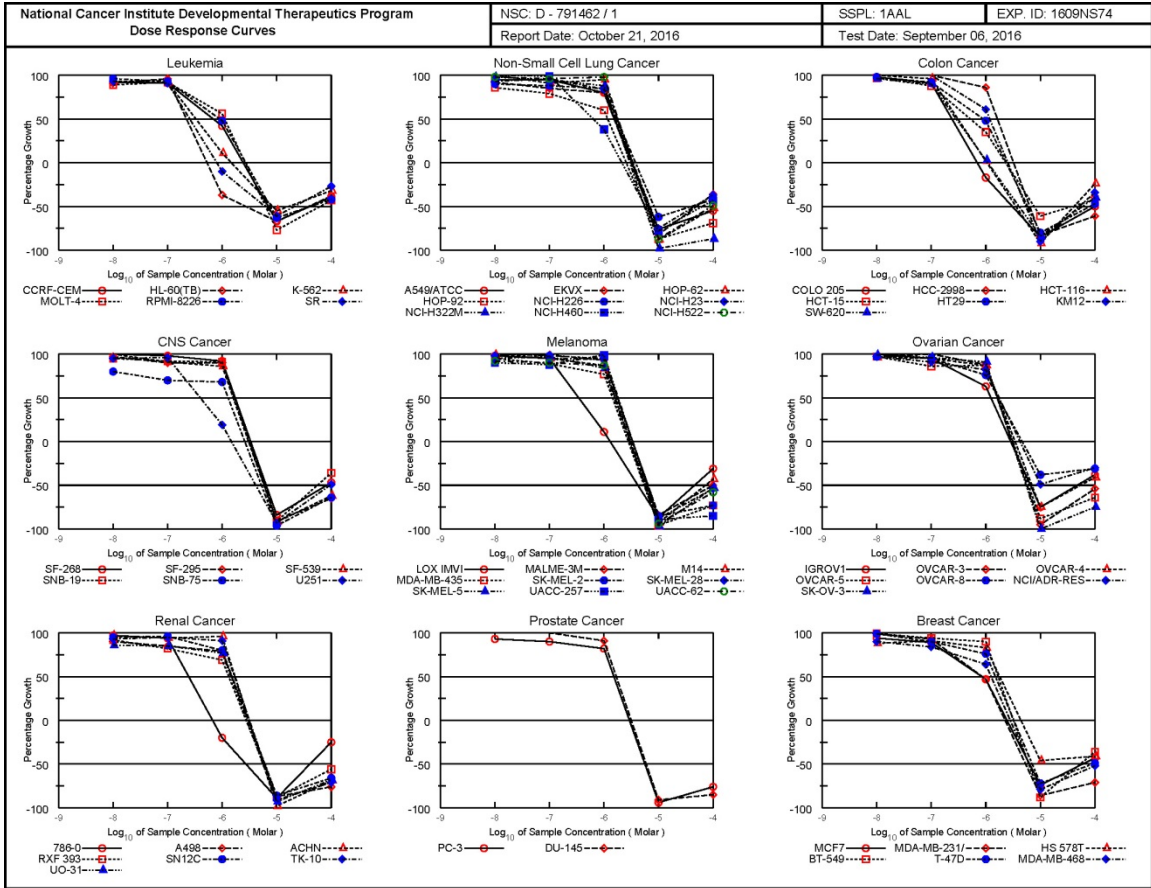

Fig. S1. Dose response curves of NCI-60 cell lines.

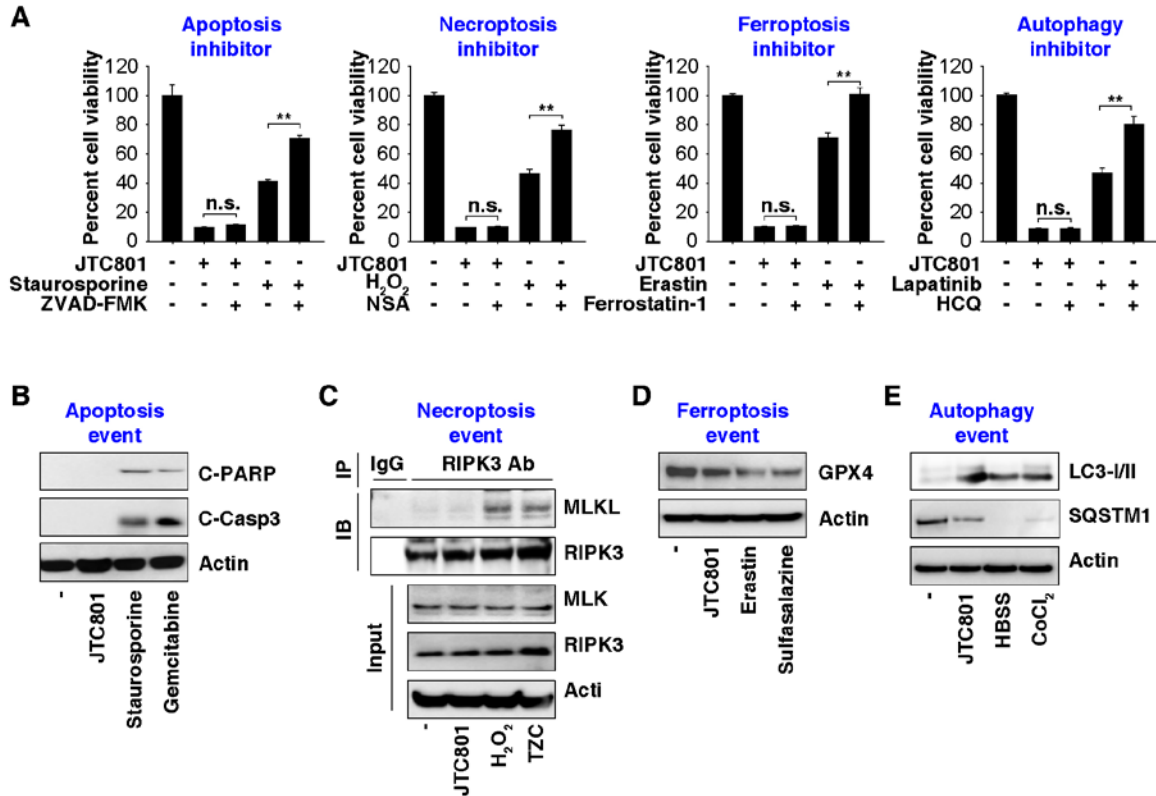

**Fig. S2. JTC801 induces alkaliptosis.** (A) MiaPaCa2 cells were treated with JTC801 (10  $\mu$ M), staurosporine (0.5  $\mu$ M), erastin (20  $\mu$ M), H<sub>2</sub>O<sub>2</sub> (500  $\mu$ M), or lapatinib (50  $\mu$ M) in the absence or presence of ZVAD-FMK (20  $\mu$ M), ferrostatin-1 (500 nM), necrosulfonamide (“NSA”, 1  $\mu$ M), and hydroxychloroquine (“HCQ”, 50  $\mu$ M) for 24 hours. Cell viability was assayed (n=3, \*\*p < 0.01, n.s.=not significant). (B) MiaPaCa2 cells were treated with JTC801 (10  $\mu$ M), staurosporine (1  $\mu$ M), or gemcitabine (5 mM) for 24 hours and the levels of cleaved-PARP (“C-PARP”), cleaved-caspase 3 (“C-Casp3”), and actin were assayed using western blot. (C) MiaPaCa2 cells were treated with JTC801 (10  $\mu$ M), H<sub>2</sub>O<sub>2</sub> (500  $\mu$ M), or TZC (TNF [50 nM]/ZVAD-FMK [20  $\mu$ M]/cycloheximide [10  $\mu$ g/ml]) for 24 hours. Cell lysates were immunoprecipitated with anti-RIPK3 antibody or control IgG, and then the levels of MLKL and RIPK3 were assayed using western blot. (D) MiaPaCa2 cells were treated with JTC801 (10  $\mu$ M), erastin (20  $\mu$ M), or salazosulfapyridine (1 mM) for 24 hours and then the levels of GPX4 and actin were assayed using western blot. (E) MiaPaCa2 cells were treated with JTC801 (10  $\mu$ M, 24 hours), CoCl<sub>2</sub> (400  $\mu$ M, 24 hours), or Hank's buffered salt solution (HBSS, six hours), and the levels of LC3-I/II, SQSTM1, and actin were assayed using western blot.

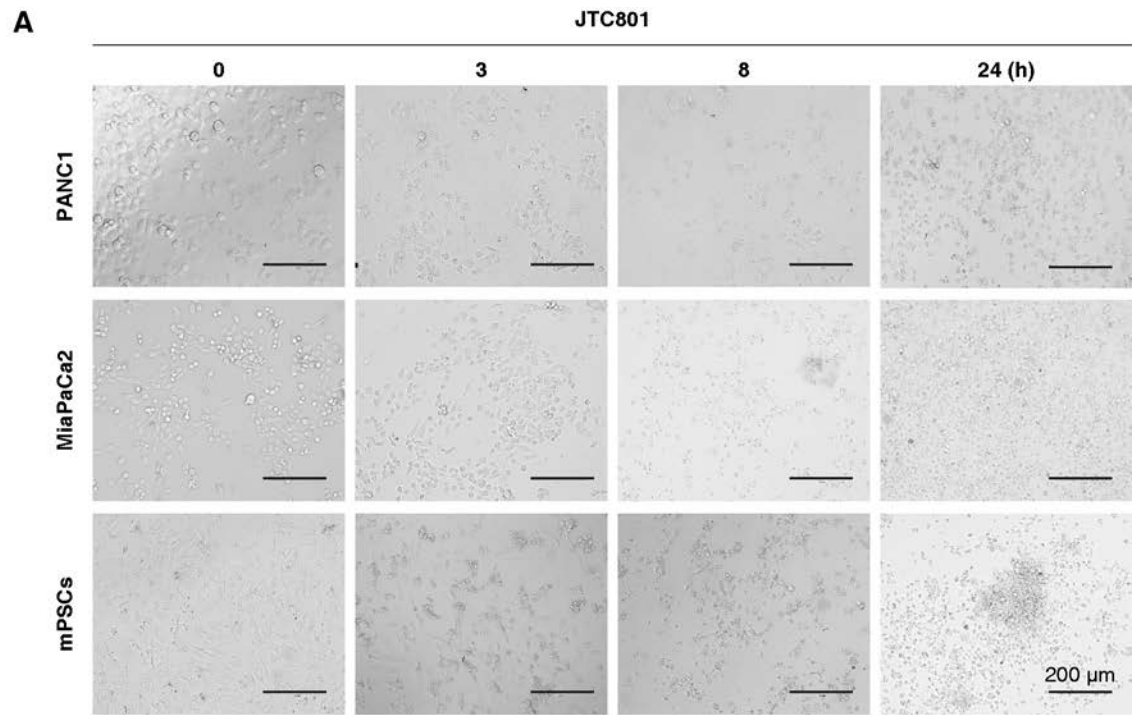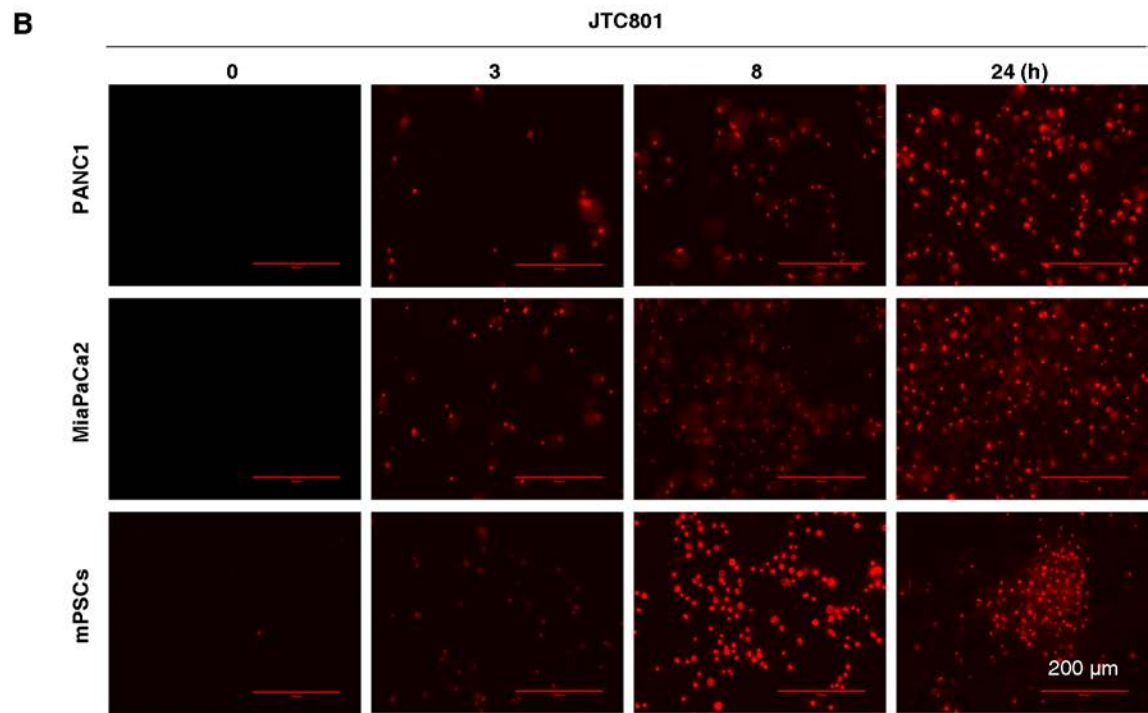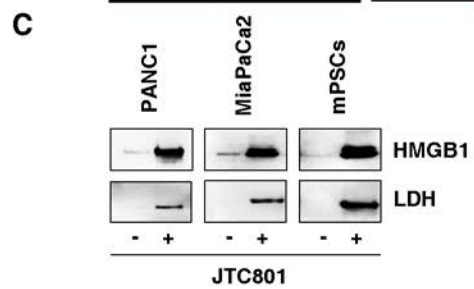

**Fig. S3. JTC801-induced alkaliptosis is a necrosis-like form of regulated cell death.**

(A) Morphological observation of indicated cells following JTC801 (10  $\mu$ M) treatment for three to 24 hours. (B) Analysis of intact plasma membranes using propidium iodide staining in indicated cells following JTC801 (10  $\mu$ M) treatment for three to 24 hours. (C) Western blot analysis of LDH and HMGB1 release in cell supernatants in indicated cells following JTC801 (10  $\mu$ M) treatment for 24 hours.

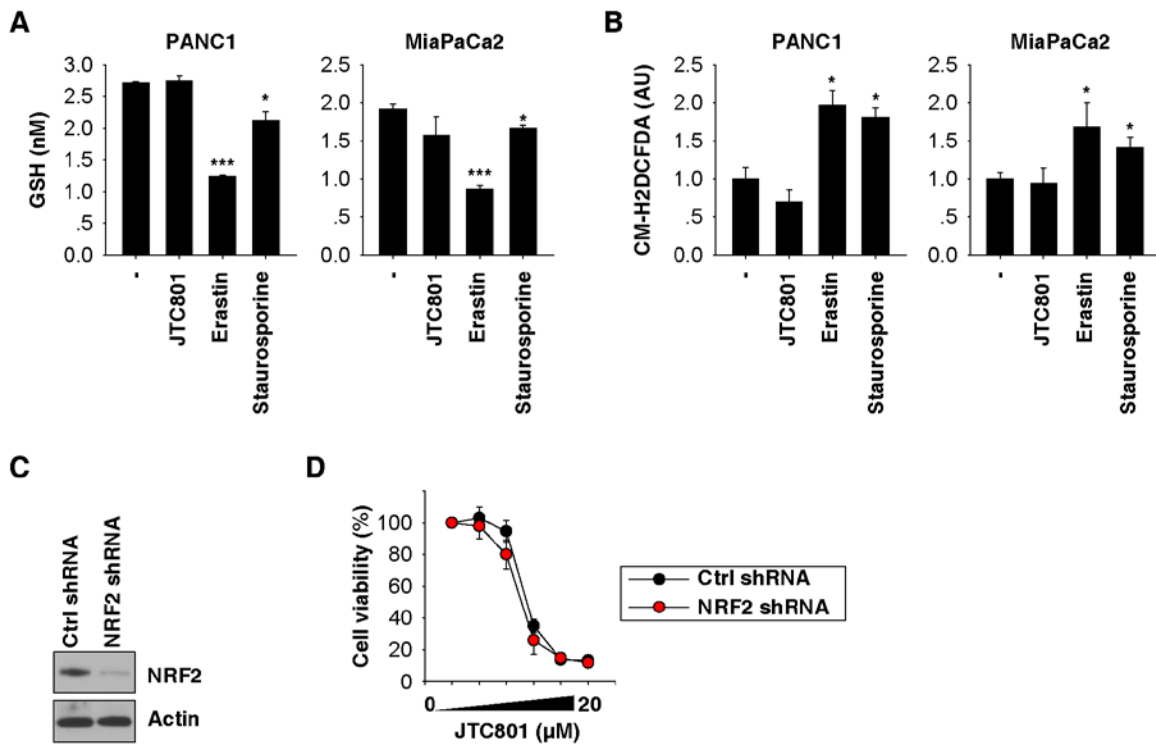

**Fig. S4. JTC801 did not cause GSH depletion and reactive oxygen species production.** (A, B) PANC1 and MiaPaCa2 cells were treated with JTC801 (10  $\mu$ M), erastin (20  $\mu$ M), or staurosporine (0.5  $\mu$ M) for 24 hours. The levels of GSH (A) and CM-H2DCFDA (an indicator for reactive oxygen species in cells) (B) were assayed (n=3, \*p < 0.05, \*\*\*p < 0.001 versus untreated group). (C, D) Effects of knockdown of NRF2 by shRNA on the anticancer activity of JTC801 (1.25, 2.5, 5, 10, and 20  $\mu$ M) for 24 hours in PANC1 cells.



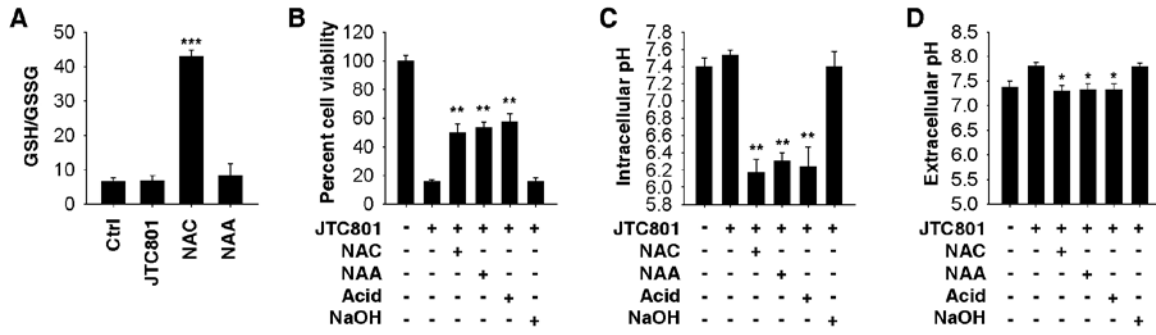

**Fig. S5. Increased intracellular pH is required for JTC801-induced cell death.** MiaPaCa2 cells were treated with JTC801 (10  $\mu$ M) in the absence or presence of N-acetylcysteine (“NAC”, 100 mM), N-acetyl alanine acid (“NAA”, 100 mM), acidic medium (pH=6, adjusted by HCl), and NAC (100 mM, pH=7, adjusted by NaOH) for 24 hours. GSH/GSSG ratio (A), cell viability (B), intracellular pH (C), and extracellular pH (D) were assayed (n=3, \*p < 0.05, \*\*p < 0.01, \*\*\*p < 0.001 versus JTC801 group).

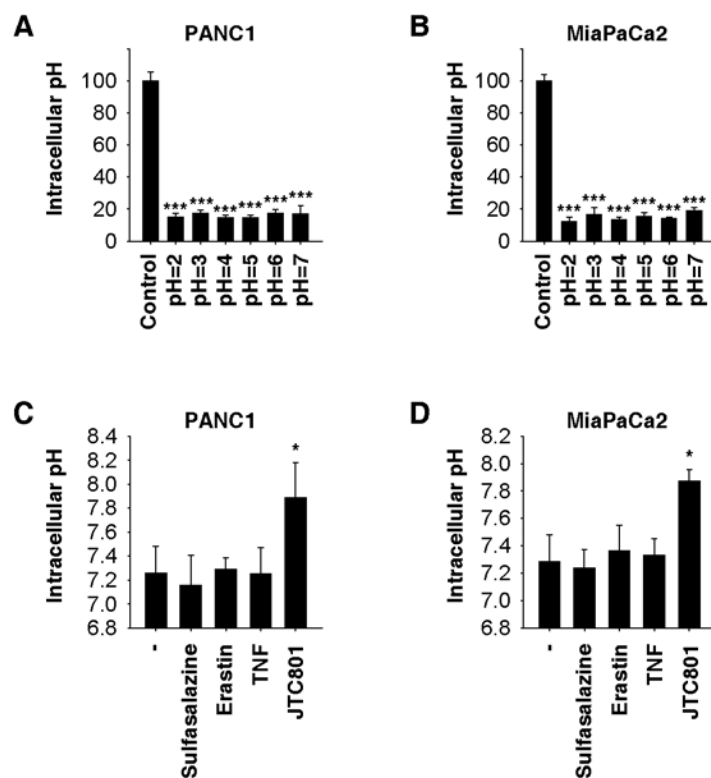

**Fig. S6. Relationship between JTC801 and pH.** (A, B) The stability of JTC801 in acid stock solution. JTC801 (200 mM) was incubated with acid stock solution (pH=2-6, adjusted by HCl) at 1:20 for six hours. PANC1 and MiaPaCa2 cells were then incubated with JTC801 (10 mM) in acid stock solution at 1:1000 for 24 hours, and then cell viability was assayed (n=3, \*\*\*p < 0.001 versus control group). (C, D) Effects of cell death inducers on pH. PANC1 and MiaPaCa2 cells were treated with staurosporine (0.5  $\mu$ M), erastin (20  $\mu$ M), TNF (50 nM), or JTC801 (10  $\mu$ M) for 24 hours. Intracellular pH levels were assayed (n=3, \*p < 0.05 versus untreated group).

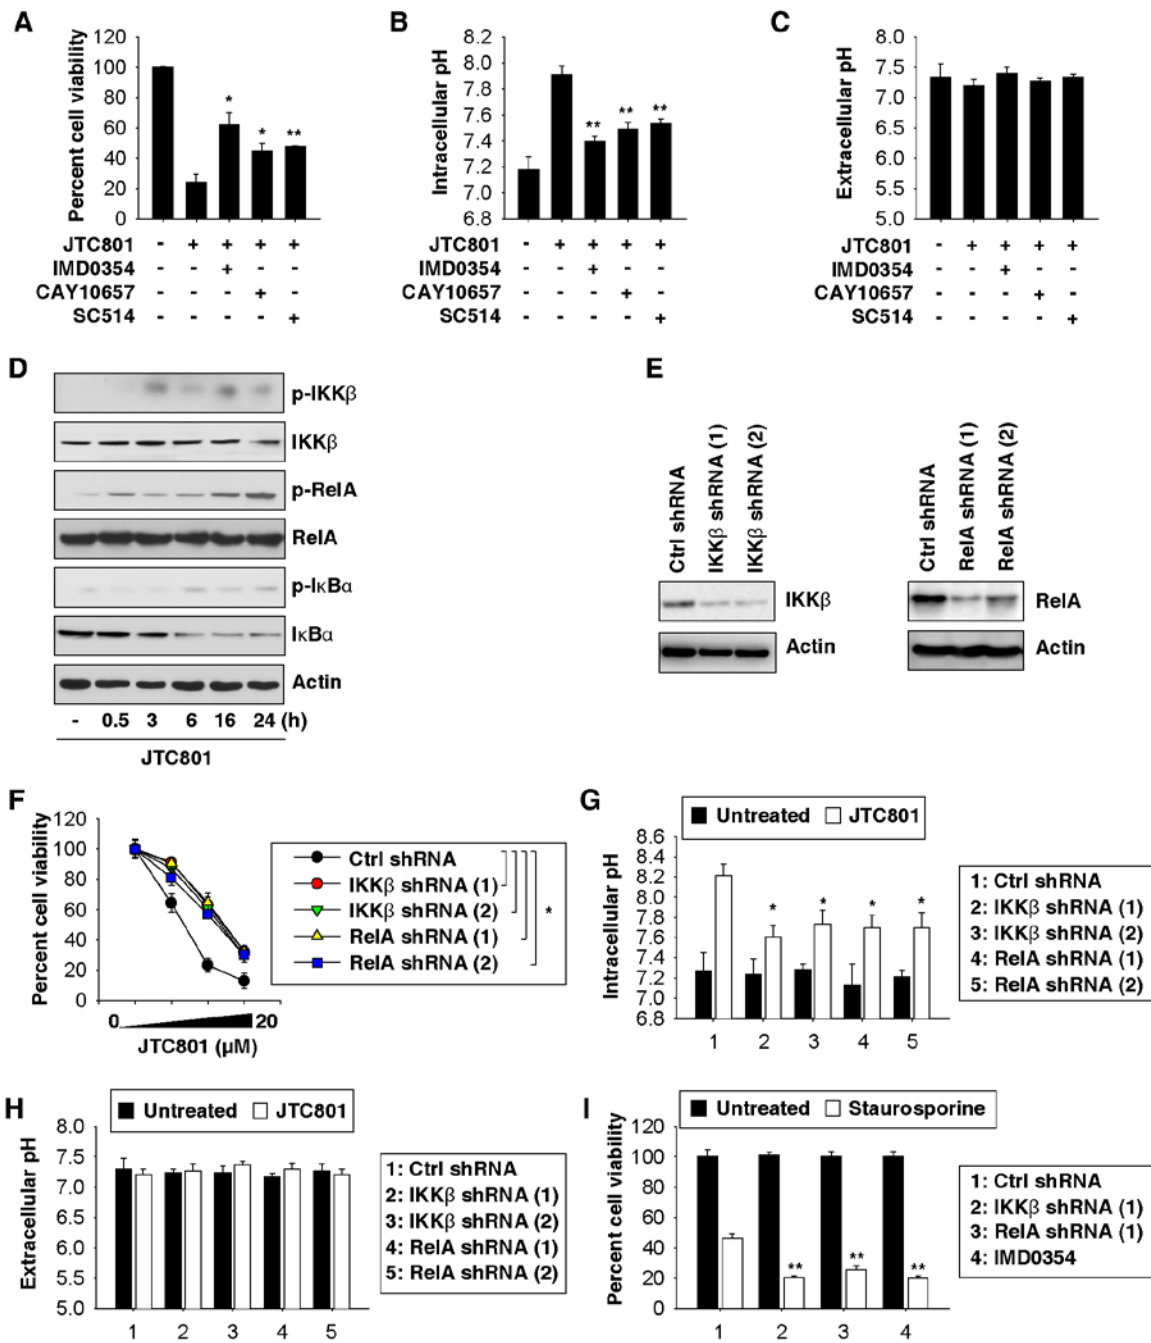

**Fig. S7. Activation of the NF- $\kappa$ B pathway contributes to alkaliptosis.** (A-C) MiaPaCa2 cells were treated with JTC801 (10  $\mu$ M) in the absence or presence of IKK $\beta$  inhibitors (IMD0354 [10  $\mu$ M], CAY10657 [10  $\mu$ M], and SC514 [10  $\mu$ M]) for 24 hours. Cell viability, intracellular pH, and extracellular pH were measured (n=3, \*p < 0.05, \*\*p < 0.01 versus JTC801 group). (D) Western blot analysis of indicated proteins in MiaPaCa2 cells following treatment with JTC801 (10  $\mu$ M) for 0.5-24 hours. (E) Western

blot analysis of IKK $\beta$  and RelA expression in indicated gene-knockdown MiaPaCa2 cells. (F) Knockdown of IKK $\beta$  and RelA inhibited JTC801 (1.25, 2.5, 5, 10, and 20  $\mu$ M)-induced cell death at 24 hours in MiaPaCa2 cells (n=3, \*p < 0.05). (G-H) Indicated MiaPaCa2 cells were treated with JTC801 (10  $\mu$ M) for 24 hours. Intracellular and extracellular pH were assayed (n=3, \*p < 0.05 versus untreated group). (I) Indicated MiaPaCa2 cells were treated with staurosporine (1  $\mu$ M) with or without IMD0354 (10  $\mu$ M) for 24 hours. Cell viability was measured (n=3, \*\*p < 0.01 versus control shRNA group).

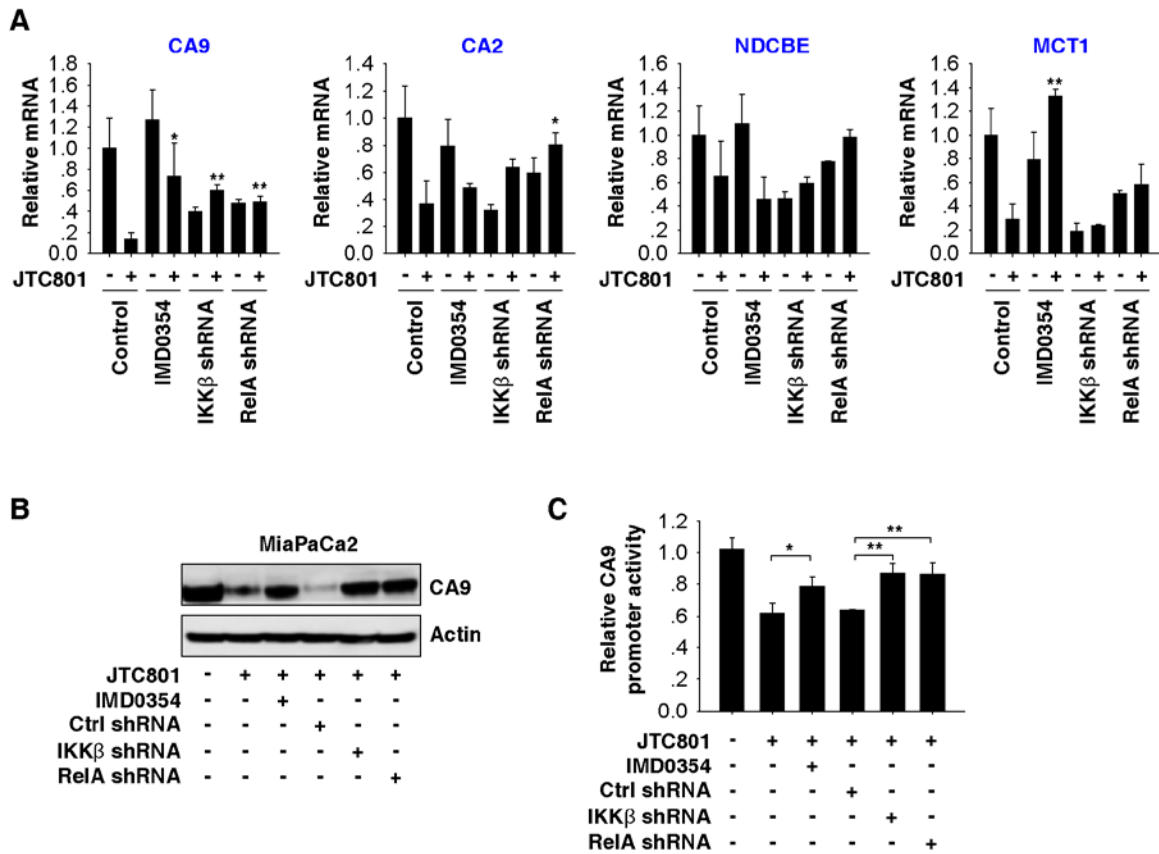

**Fig. S8. CA9 is a negative transcriptional target of NF- $\kappa$ B in alkaliptosis.** (A) Q-PCR analysis of mRNA levels of CA9, CA2, NDCBE, and MCT1 in indicated MiaPaCa2 cells following treatment with JTC801 (10  $\mu$ M) in the absence or presence of IMD0354 (10  $\mu$ M) for 24 hours (n=3, \*p < 0.05, \*\*p < 0.01 versus control JTC801 group). (B-C) In parallel, the protein expression and promoter luciferase activity of CA9 were measured (n=3, \*p < 0.05, \*\*p < 0.01).

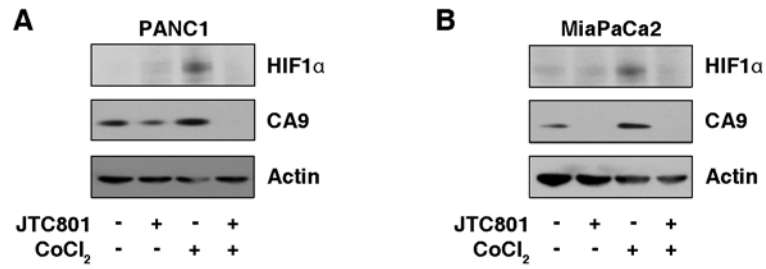

**Fig. S9. HIF1 $\alpha$  is not required for CA9 expression in alkaliptosis.** PANC1 (A) and MiaPaCa2 (B) cells were treated with JTC801 (10  $\mu$ M) in the absence or presence of CoCl<sub>2</sub> (100  $\mu$ M) for 24 hours. The indicated protein levels were assayed using western blot.

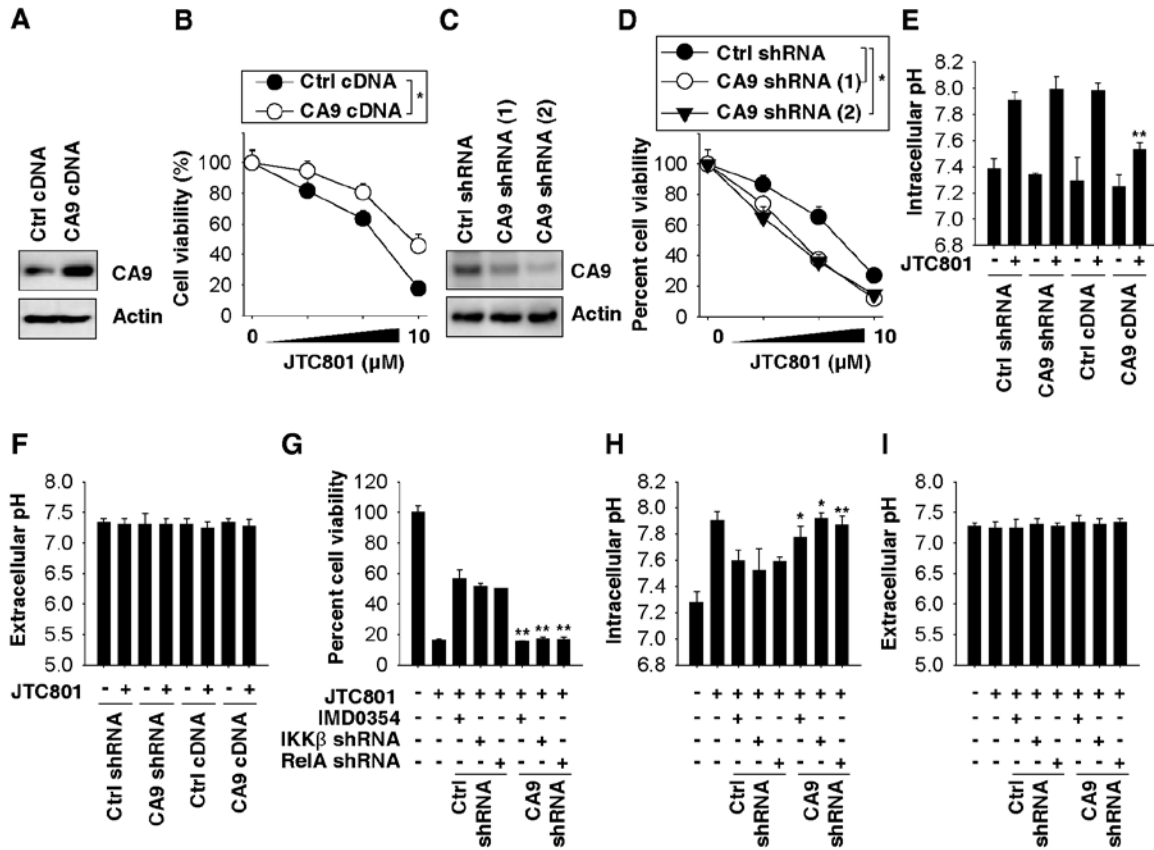

**Fig. S10. CA9 downregulation contributes to alkaliptosis.** (A) Western blot analysis of CA9 expression in CA9-overexpressed MiaPaCa2 cells. (B) Overexpression of CA9 inhibited JTC801-induced cell death at 24 hours in MiaPaCa2 cells (n=3, \*p < 0.05). (C) Western blot analysis of CA9 expression in CA9-knockdown MiaPaCa2 cells. (D) Knockdown of CA9 increased JTC801-induced cell death at 24 hours in MiaPaCa2 cells (n=3, \*p < 0.05 versus control shRNA group). (E, F) Intracellular and extracellular pH were assayed in indicated MiaPaCa2 cells following treatment with JTC801 (10 μM) for 24 hours (n=3, \*p < 0.05 versus control group). (G-I) Knockdown of CA9 restored JTC801-induced cell death in NF-κB pathway-inhibition (IMD0354 [10 μM]) or -knockdown (IKKβ shRNA or RelA shRNA) MiaPaCa2 cells. In parallel, intracellular and extracellular pH was assayed (n=3, \*p < 0.05, \*\*p < 0.01 versus control shRNA group).

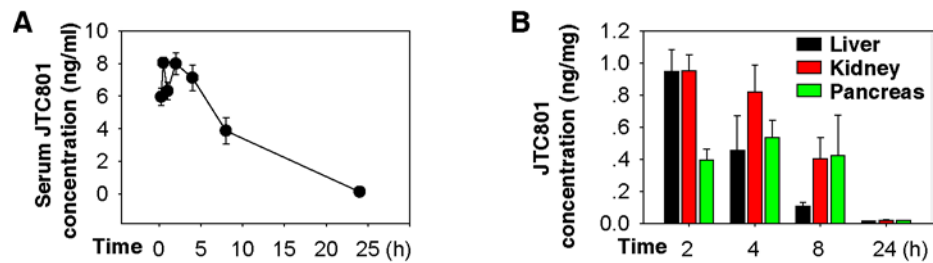

**Fig. S11.** JTC801 concentration-time courses in serum and tissues resulting from oral injection of JTC801 (20 mg/kg at a single dose) in C57BL/6 mice (n=4 mice/time).



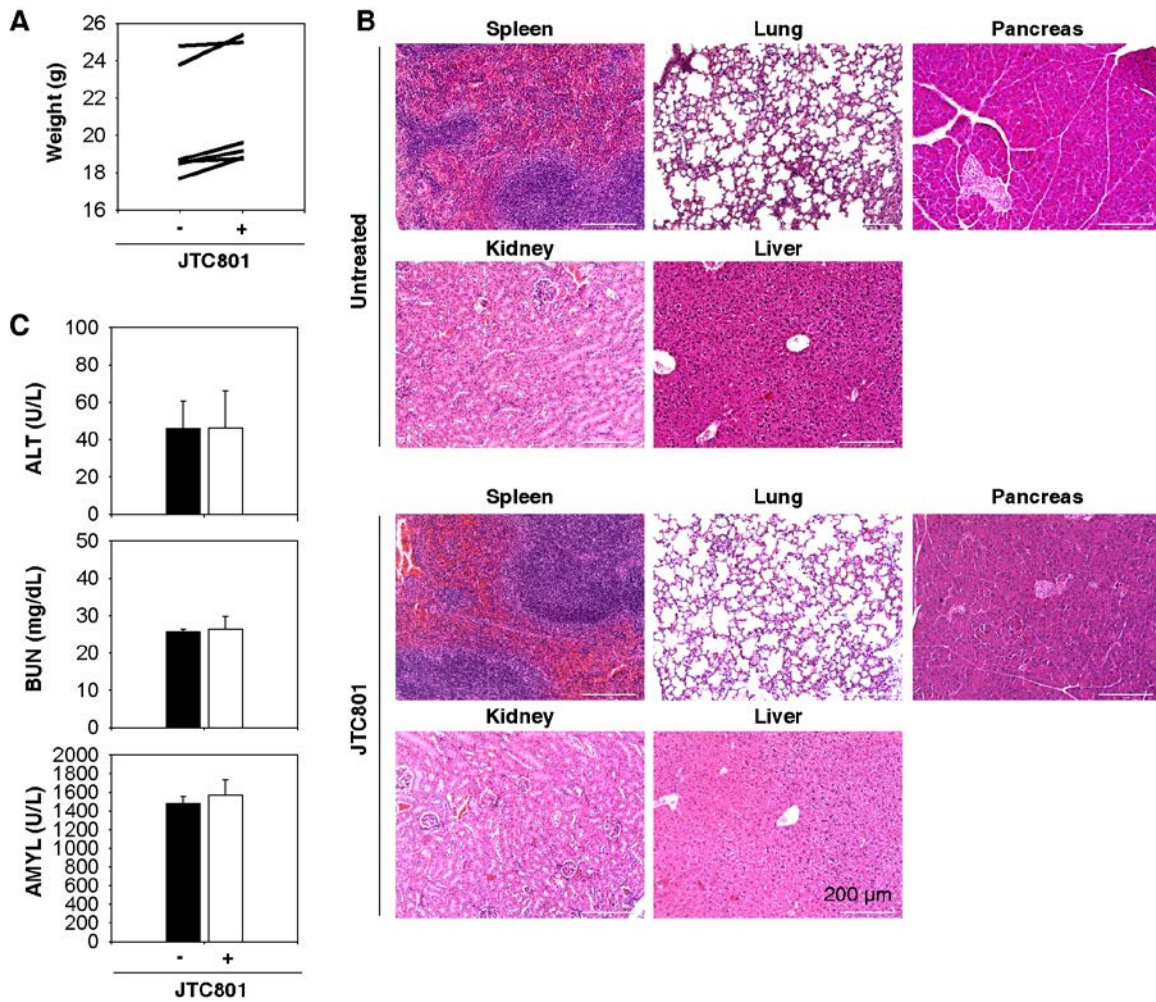

**Fig. S12. JTC801 is safe *in vivo*.** C57BL/6 mice at six to eight weeks were orally injected with JTC801 (20 mg/kg) for seven days and then sacrificed on day 8. The body weights of mice (A), histopathology (B), and enzyme activities in the serum (C) were assayed. The control group was age-matched C57BL/6 mice without JTC801 treatment (n=6 mice/group).

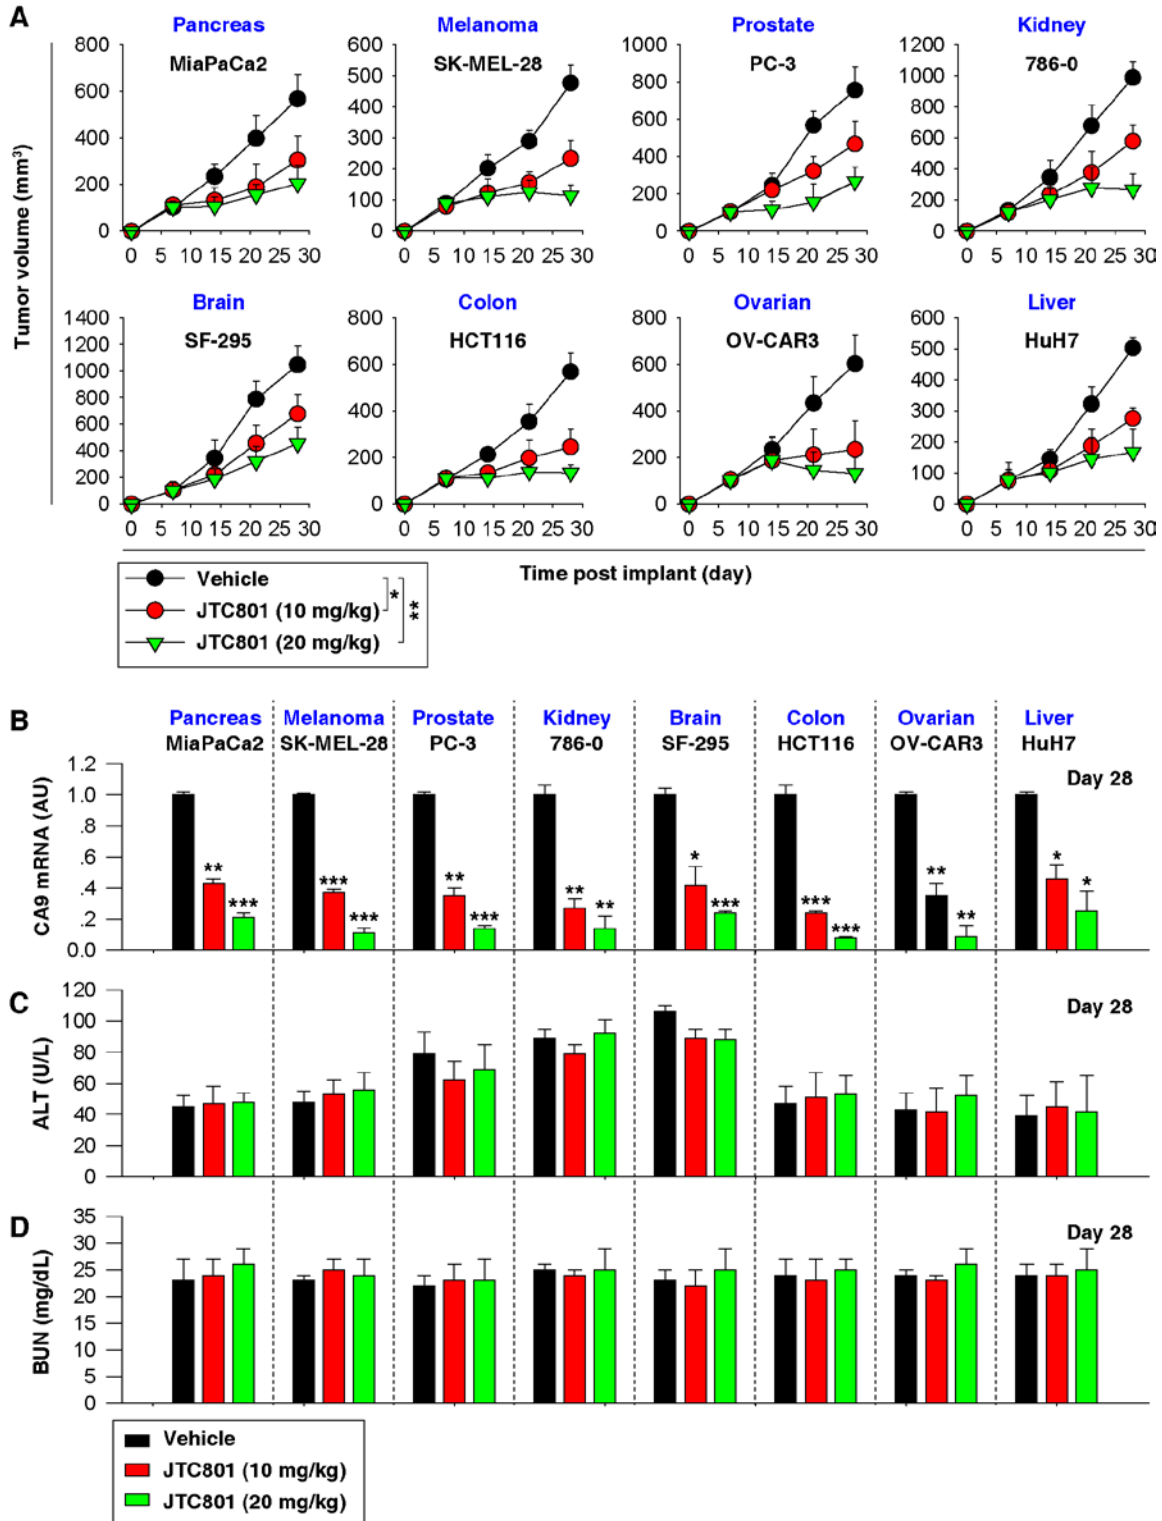

**Fig. S13. Anticancer activity of JTC801 *in vivo*.** (A) Oral injection of JTC801 (10 or 20 mg/kg, once every day, at day 7 for two weeks) inhibited tumor growth in nude mouse

xenograft models with multiple human tumor cell lines (n=8 mice/group, \*p < 0.05, \*\*p < 0.01). (B-D) In parallel, CA9 mRNA in tumor (B) and enzyme-activities (C, D) in the serum were assayed at day 28 (n=3 mice/group, \*p < 0.05, \*\*p < 0.01, \*\*\*p < 0.001 versus vehicle group).

## Extended Data Table 1

### The ranking of the relative anticancer activity of 254 GPCR compounds

|                                 |             |
|---------------------------------|-------------|
| JTC-801                         | 0.151494183 |
| BMS-833923                      | 0.382131923 |
| PNU-120596                      | 0.664884334 |
| Amfebutamone HCl                | 0.745468952 |
| Almotriptan Malate              | 0.750857589 |
| FLI-06                          | 0.752435291 |
| Phenoxybenzamine HCl            | 0.757838324 |
| Synephrine HCl                  | 0.782454598 |
| SB271046                        | 0.783311881 |
| Amantadine HCl                  | 0.789925208 |
| Hesperetin                      | 0.792007182 |
| Ketanserin                      | 0.799600261 |
| Prucalopride                    | 0.800212606 |
| Isoprenaline HCl                | 0.80229458  |
| Ciproxifan                      | 0.81478642  |
| NPS-2143                        | 0.814908889 |
| (-)-MK 801 Maleate              | 0.817970615 |
| Ritodrine HCl                   | 0.819317774 |
| Cisatracurium Besylate          | 0.823726659 |
| WAY-100635 Maleate              | 0.825318756 |
| Equol                           | 0.826788385 |
| PF-5274857                      | 0.828380482 |
| Benserazide HCl                 | 0.829972579 |
| Asenapine                       | 0.834995346 |
| IEM 1754 dihydrobroMide         | 0.835238747 |
| LDE225 (NVP-LDE225,Erismodegib) | 0.840872322 |
| L-Adrenaline                    | 0.843811579 |
| GW842166X                       | 0.844423924 |
| Levosulpiride                   | 0.852384411 |
| BML-190                         | 0.855323667 |
| Vismodegib (GDC-0449)           | 0.858529451 |
| VU 0364770                      | 0.859120207 |
| VUF 10166                       | 0.860589835 |
| Macitentan                      | 0.860979683 |
| ADX-47273                       | 0.865366127 |
| BRL-54443                       | 0.867080694 |
| VU 0357121                      | 0.878715251 |
| Ethynodiol diacetate            | 0.882688561 |
| Almorexant HCl                  | 0.883001667 |
| Phenylephrine HCl               | 0.886185861 |
| BRL-15572                       | 0.888390304 |
| Suvorexant (MK-4305)            | 0.889646535 |
| Canagliflozin                   | 0.890717215 |
| Famotidine                      | 0.896157426 |
| Timolol Maleate                 | 0.90147509  |
| Loratadine                      | 0.902007712 |
| Dopamine HCl                    | 0.902964118 |
| MetoclopraMide HCl              | 0.908293905 |

|                                       |             |
|---------------------------------------|-------------|
| Hydroxyzine 2HCl                      | 0.910381297 |
| Carvedilol                            | 0.915436777 |
| Estriol                               | 0.915578427 |
| MK-801 (Dizocilpine)                  | 0.916925587 |
| Clonidine HCl                         | 0.919742374 |
| Clomifene citrate                     | 0.921701879 |
| Biperiden HCl                         | 0.922350751 |
| Olanzapine                            | 0.924886073 |
| MRS 2578                              | 0.927947799 |
| Naphazoline HCl                       | 0.92905002  |
| SB269970 HCl                          | 0.929784834 |
| ADL5859 HCl                           | 0.934051323 |
| 5-hydroxymethyl Tolterodine (PNU 200) | 0.935418409 |
| Decamethonium Bromide                 | 0.944892847 |
| BMY 7378                              | 0.946440622 |
| Medroxyprogesterone acetate           | 0.947420374 |
| Bethanechol chloride                  | 0.94791025  |
| Loperamide HCl                        | 0.950849506 |
| Clomipramine HCl                      | 0.951829259 |
| Epinephrine HCl                       | 0.953242416 |
| Lidocaine                             | 0.954660285 |
| Naftopidil                            | 0.955135922 |
| Lafutidine                            | 0.955458051 |
| Naltrexone HCl                        | 0.955748267 |
| Fluvoxamine maleate                   | 0.956255817 |
| Mifepristone                          | 0.956360612 |
| Rotundine                             | 0.965300851 |
| Pancuronium dibromide                 | 0.968852453 |
| Fesoterodine Fumarate                 | 0.97803763  |
| Zolmitriptan                          | 0.978726233 |
| Doxazosin Mesylate                    | 0.989230156 |
| Bisoprolol fumarate                   | 0.993218987 |
| Sotalol                               | 0.994448479 |
| CTEP (RO4956371)                      | 0.995305762 |
| Azatadine dimaleate                   | 0.995825216 |
| Aripiprazole                          | 0.996410052 |
| SB408124                              | 0.997606701 |
| Bazedoxifene HCl                      | 0.99812255  |
| Org 27569                             | 0.998271506 |
| Rivastigmine Tartrate                 | 0.998936312 |
| Naftopidil DiHCl                      | 1.002393299 |
| Estradiol valerate                    | 1.004313944 |
| Tianeptine sodium                     | 1.009307273 |
| Rimonabant                            | 1.009602004 |
| Prasugrel                             | 1.013694987 |
| Toremifene Citrate                    | 1.014226832 |
| Atropine                              | 1.01441093  |
| Bupivacaine HCl                       | 1.015513151 |
| Mianserin HCl                         | 1.01781678  |
| Pramipexole                           | 1.020411912 |

|                        |             |
|------------------------|-------------|
| Cyproheptadine HCl     | 1.022869299 |
| Clozapine              | 1.023841045 |
| Sertraline HCl         | 1.024074589 |
| Zibotentan (ZD4054)    | 1.02552852  |
| Sitaxentan sodium      | 1.025605344 |
| Tamoxifen Citrate      | 1.032841377 |
| Dapagliflozin          | 1.03696317  |
| RS-127445              | 1.038904735 |
| Fluoxetine HCl         | 1.040420157 |
| PRX-08066 Maleic acid  | 1.041052046 |
| Silodosin              | 1.041483845 |
| Escitalopram Oxalate   | 1.046200946 |
| Nefiracetam            | 1.05105704  |
| Forskolin              | 1.056172867 |
| Ondansetron HCl        | 1.056508443 |
| Duloxetine HCl         | 1.057971014 |
| Roxatidine Acetate HCl | 1.060231352 |
| Cimetidine             | 1.062225768 |
| Raloxifene HCl         | 1.063289456 |
| Drospirenone           | 1.06501795  |
| Naratriptan            | 1.067278287 |
| Orphenadrine Citrate   | 1.070735275 |
| Scopolamine HBr        | 1.071603965 |
| Maprotiline HCl        | 1.074053345 |
| Rocuronium Bromide     | 1.080441431 |
| Aniracetam             | 1.081505119 |
| Arecoline              | 1.082871115 |
| PF-543                 | 1.095185082 |
| Irsogladine            | 1.096662678 |
| Ramelteon              | 1.097726366 |
| Agomelatine            | 1.097726366 |
| Rotigotine             | 1.099220707 |
| Etomidate              | 1.099720782 |
| Tropicamide            | 1.102380003 |
| JNJ-7777120            | 1.103395491 |
| Trimebutine            | 1.106368834 |
| Niflumic acid          | 1.108822711 |
| Ivabradine HCl         | 1.109825821 |
| SANT-1                 | 1.111049262 |
| Quetiapine Fumarate    | 1.112618003 |
| Sumatriptan Succinate  | 1.113681691 |
| Risperidone            | 1.11474538  |
| WZ811                  | 1.119955469 |
| Ketotifen Fumarate     | 1.120329743 |
| Domperidone            | 1.120958981 |
| (+)-Matrine            | 1.123163424 |
| Azelastine HCl         | 1.124510583 |
| Estrone                | 1.126047068 |
| Scopine                | 1.126470088 |
| Olopatadine HCl        | 1.134430574 |

|                                  |             |
|----------------------------------|-------------|
| Benztropine mesylate             | 1.139716115 |
| AM251                            | 1.141533778 |
| VU 0364439                       | 1.141664347 |
| Cinacalcet HCl                   | 1.142534237 |
| Desvenlafaxine                   | 1.144586696 |
| Ranitidine                       | 1.148517484 |
| Hexestrol                        | 1.149126857 |
| Metoprolol Tartrate              | 1.151176705 |
| Xylazine HCl                     | 1.151698707 |
| Racecadotril                     | 1.156474999 |
| Clemastine Fumarate              | 1.160882861 |
| Fulvestrant                      | 1.16327616  |
| Betaxolol                        | 1.165403537 |
| Vortioxetine (Lu AA21004) HBr    | 1.167826329 |
| Bambuterol HCl                   | 1.169774562 |
| Ginkgolide A                     | 1.170589017 |
| Desloratadine                    | 1.170609519 |
| Pregnenolone                     | 1.172982316 |
| Detomidine HCl                   | 1.173115277 |
| VU 0361737                       | 1.17561926  |
| Mosapride Citrate                | 1.176173381 |
| Terazosin HCl                    | 1.177768914 |
| Desvenlafaxine Succinate         | 1.179237406 |
| Nebivolol                        | 1.180827018 |
| Methscopolamine                  | 1.180827018 |
| Phentolamine Mesylate            | 1.181491823 |
| Nizatidine                       | 1.187608031 |
| Labetalol HCl                    | 1.189535207 |
| Brompheniramine hydrogen maleate | 1.197991998 |
| Cetirizine DiHCl                 | 1.203962239 |
| Oxymetazoline HCl                | 1.205952484 |
| Urapidil HCl                     | 1.20662146  |
| Pyridostigmine Bromide           | 1.209014759 |
| (+)-Bicuculline                  | 1.209852491 |
| Megestrol Acetate                | 1.211009174 |
| PD128907 HCl                     | 1.213423095 |
| MPEP                             | 1.214157909 |
| Medetomidine HCl                 | 1.217227943 |
| Fexofenadine HCl                 | 1.217645422 |
| AM1241                           | 1.218454993 |
| Propranolol HCl                  | 1.218897857 |
| Memantine HCl                    | 1.21938572  |
| Dapoxetine HCl                   | 1.220050525 |
| Synephrine                       | 1.229589006 |
| Clopidogrel                      | 1.235872889 |
| Trospium chloride                | 1.239508997 |
| Empagliflozin (BI 10773)         | 1.243807403 |
| SB742457                         | 1.246312274 |
| Alfuzosin HCl                    | 1.249833799 |
| Paroxetine HCl                   | 1.250208739 |

|                                 |             |
|---------------------------------|-------------|
| Acetylcholine Chloride          | 1.25249302  |
| Tiotropium Bromide hydrate      | 1.259104041 |
| Flavoxate HCl                   | 1.26593376  |
| Tizanidine HCl                  | 1.266055046 |
| Guanabenz Acetate               | 1.283607014 |
| Gallamine Triethiodide          | 1.286292165 |
| Tolazoline HCl                  | 1.290286669 |
| Epinephrine Bitartrate          | 1.29559981  |
| Cyclizine 2HCl                  | 1.310743112 |
| Carteolol HCl                   | 1.31658781  |
| Solifenacin succinate           | 1.317283607 |
| Flumazenil                      | 1.326286398 |
| Eletriptan HBr                  | 1.329529641 |
| Amisulpride                     | 1.33931658  |
| Tropisetron                     | 1.343704295 |
| Homatropine Bromide             | 1.347620373 |
| Bepotastine Besilate            | 1.352351795 |
| Otilonium Bromide               | 1.354578347 |
| Hyoscyamine                     | 1.35917061  |
| Histamine 2HCl                  | 1.368355135 |
| Tripelennamine HCl              | 1.375173949 |
| Venlafaxine                     | 1.375349023 |
| NMDA (N-Methyl-D-aspartic acid) | 1.397300306 |
| Gestodene                       | 1.401010504 |
| Bosentan Hydrate                | 1.405093237 |
| Acebutolol HCl                  | 1.410659616 |
| Fingolimod (FTY720) HCl         | 1.430281102 |
| Tolterodine tartrate            | 1.432887587 |
| Amitriptyline HCl               | 1.433064292 |
| Acidinium Bromide               | 1.435151684 |
| Altrenogest                     | 1.43876983  |
| Rupatadine Fumarate             | 1.448093515 |
| Bosentan                        | 1.451711662 |
| Chlorprothixene                 | 1.455125648 |
| Dienogest                       | 1.455923414 |
| Purmorphamine                   | 1.470219872 |
| Chlorpheniramine Maleate        | 1.477463103 |
| Rizatriptan Benzoate            | 1.480122324 |
| Formoterol Hemifumarate         | 1.487435181 |
| Adrenalone HCl                  | 1.495546897 |
| Ticagrelor                      | 1.509602004 |
| Ifenprodil Tartrate             | 1.511967715 |
| Oxybutynin chloride             | 1.515725021 |
| Tetrahydrozoline HCl            | 1.53993877  |
| Allopurinol                     | 1.551788326 |
| Lorcaserin HCl                  | 1.576676872 |
| Naloxone HCl                    | 1.581408294 |
| Diphepanil Methylsulfate        | 1.592819371 |
| Betahistine 2HCl                | 1.600473142 |
| Indacaterol Maleate             | 1.658780963 |



|                    |             |
|--------------------|-------------|
| Mirabegron         | 1.691344281 |
| Pergolide mesylate | 1.691900918 |
| Darifenacin HBr    | 1.706790982 |
| Levodropropizine   | 1.801836905 |
| Dexmedetomidine    | 1.835930977 |
| Atomoxetine HCl    | 2.210269969 |

**Extended Data Table 2****The relative effects of 416 inhibitors on anticancer activity of JTC801**

|                                         |             |
|-----------------------------------------|-------------|
| IMD 0354                                | 2.916986196 |
| BYL719                                  | 2.505368098 |
| Torin 2                                 | 2.495207055 |
| AZ 628                                  | 2.437308282 |
| Torin 1                                 | 2.273964724 |
| VX-745                                  | 2.16583589  |
| CCT129202                               | 2.10877919  |
| INK 128 (MLN0128)                       | 2.089915644 |
| Tofacitinib citrate (CP-690550 citrate) | 2.087423313 |
| Quizartinib (AC220)                     | 2.06621342  |
| Piceatannol                             | 2.007285276 |
| Skepinone-L                             | 1.954371166 |
| TG 100713                               | 1.953412577 |
| Tideglusib                              | 1.938075153 |
| Tofacitinib (CP-690550, Tasocitinib)    | 1.929447853 |
| NVP-BVU972                              | 1.920437117 |
| SAR131675                               | 1.861004601 |
| Vandetanib (Zactima)                    | 1.841123012 |
| Tyrphostin AG 879 (AG 879)              | 1.833013804 |
| XL765                                   | 1.814809341 |
| SB203580                                | 1.798696319 |
| PD98059                                 | 1.777032209 |
| Sorafenib Tosylate                      | 1.761503067 |
| JNJ-7706621                             | 1.741797221 |
| SL-327                                  | 1.73006135  |
| Semaxanib (SU5416)                      | 1.728719325 |
| AZD4547                                 | 1.708780675 |
| TWS119                                  | 1.699822643 |
| GDC-0068                                | 1.698619632 |
| Vemurafenib (PLX4032, RG7204)           | 1.667753067 |
| AZD8330                                 | 1.658934049 |
| CI-1033 (Canertinib)                    | 1.64621876  |
| Nilotinib (AMN-107)                     | 1.646056475 |
| SB 431542                               | 1.64492048  |
| PD0325901                               | 1.633435583 |
| ON-01910                                | 1.630357671 |
| Empty                                   | 1.616947853 |
| SB202190 (FHPI)                         | 1.614263804 |
| Empty                                   | 1.597776074 |
| HMN-214                                 | 1.584540349 |
| Amuvatinib (MP-470)                     | 1.572568726 |
| PIK-90                                  | 1.568430387 |
| VX-702                                  | 1.54773773  |
| KRN 633                                 | 1.535471475 |
| AMG-208                                 | 1.527047    |
| WP1066                                  | 1.506710123 |
| AS703026 (pimasertib)                   | 1.487732782 |
| PHT-427                                 | 1.484776825 |

|                                   |             |
|-----------------------------------|-------------|
| PHA-793887                        | 1.479456104 |
| Thiazovivin                       | 1.47635235  |
| Vemurafenib (PLX4032)             | 1.46689329  |
| Tandutinib (MLN518)               | 1.462836741 |
| Baricitinib (LY3009104,incb28050) | 1.458588957 |
| Dinaciclib (SCH727965)            | 1.457630368 |
| PLX-4720                          | 1.455329755 |
| Tivozanib (AV-951)                | 1.451522317 |
| CI-1040 (PD184352)                | 1.446689387 |
| CYC116                            | 1.446349394 |
| R406 (free base)                  | 1.427135678 |
| INCB28060                         | 1.419095092 |
| SP600125                          | 1.413535276 |
| AST-1306                          | 1.402157848 |
| PD0325901                         | 1.392973061 |
| MGCD-265                          | 1.390186225 |
| BIX 02189                         | 1.37327454  |
| Temsirolimus (Torisel)            | 1.371957157 |
| PD318088                          | 1.369056748 |
| 3-Methyladenine                   | 1.337998466 |
| Motesanib Diphosphate (AMG-706)   | 1.335929893 |
| AT7519                            | 1.334023056 |
| SB 525334                         | 1.333431865 |
| E7080 (Lenvatinib)                | 1.326041975 |
| Deforolimus (Ridaforolimus)       | 1.317185979 |
| Golvatinib (E7050)                | 1.30732362  |
| SGX-523                           | 1.302499189 |
| Apoptosis Activator 2             | 1.29765131  |
| TG100-115                         | 1.279337866 |
| Dabrafenib (GSK2118436)           | 1.259202454 |
| Hesperadin                        | 1.255690216 |
| Pazopanib HCl                     | 1.23823434  |
| AZ628                             | 1.235050167 |
| Vatalanib 2HCl (PTK787)           | 1.226144109 |
| Desmethyl Erlotinib (CP-473420)   | 1.223734663 |
| Dasatinib (BMS-354825)            | 1.220707562 |
| PD98059                           | 1.216523795 |
| Telatinib (BAY 57-9352)           | 1.214715719 |
| Y-27632 2HCl                      | 1.212917884 |
| ZM 336372                         | 1.212615031 |
| VX-680 (MK-0457, Tozasertib)      | 1.20464135  |
| Trametinib (GSK1120212)           | 1.203796012 |
| KU-60019                          | 1.202926397 |
| AEE788 (NVP-AEE788)               | 1.201152823 |
| PD184352 (CI-1040)                | 1.196319018 |
| Sunitinib Malate (Sutent)         | 1.1938494   |
| U0126-EtOH                        | 1.1906037   |
| CP 673451                         | 1.178983151 |
| SB 202190                         | 1.170723791 |
| LY2811376                         | 1.170280036 |

|                                  |             |
|----------------------------------|-------------|
| IC-87114                         | 1.16553355  |
| ZSTK474                          | 1.164556962 |
| PI-103                           | 1.163096397 |
| AZD6244 (Selumetinib)            | 1.154089581 |
| Carfilzomib (PR-171)             | 1.152213189 |
| SU11274                          | 1.150843882 |
| Roscovitine (Seliciclib, CYC202) | 1.149302175 |
| KW 2449                          | 1.144546261 |
| TAK-632                          | 1.144171779 |
| XL-184 (Cabozantinib)            | 1.137698799 |
| Bosutinib (SKI-606)              | 1.130963973 |
| PIK-93                           | 1.124445758 |
| VX-702                           | 1.108128834 |
| Saracatinib (AZD0530)            | 1.106945797 |
| AMG458                           | 1.106622074 |
| GSK1120212 (Trametinib)          | 1.100869565 |
| Ki8751                           | 1.087200709 |
| Axitinib                         | 1.085361895 |
| PD 0332991 (Palbociclib) HCl     | 1.084631613 |
| Cyt387                           | 1.082809365 |
| GDC-0980 (RG7422)                | 1.079866221 |
| AG-490                           | 1.07603051  |
| MLN8054                          | 1.074813372 |
| SB 203580                        | 1.069782538 |
| CHIR-98014                       | 1.06367893  |
| Oprozomib (ONX 0912)             | 1.061878952 |
| Nicorandil (Ikorel)              | 1.056698445 |
| Amiodarone HCl                   | 1.055193176 |
| Nateglinide (Starlix)            | 1.05469142  |
| AZD8931                          | 1.053207213 |
| XL147                            | 1.04633236  |
| PF-04217903                      | 1.04211295  |
| Leupeptin Hemisulfate            | 1.038392051 |
| Vinpocetine (Cavinton)           | 1.037631711 |
| (+)-Bicuculline                  | 1.036126443 |
| PHA-767491                       | 1.028227425 |
| YM201636                         | 1.024534437 |
| Nimodipine (Nimotop)             | 1.023080783 |
| Gliclazide (Diamicron)           | 1.02207727  |
| Amlodipine (Norvasc)             | 1.020070246 |
| VX-222                           | 1.017163505 |
| Phenytoin sodium (Dilantin)      | 1.017059709 |
| A-803467                         | 1.017059709 |
| AG-1024                          | 1.016848951 |
| Lacidipine (Lacipil, Motens)     | 1.01304566  |
| PD318088                         | 1.010493645 |
| TAK-438                          | 1.009533367 |
| TSU-68 (SU6668)                  | 1.008276678 |
| Repaglinide                      | 1.007526342 |
| BIRB 796 (Doramapimod)           | 1.007093558 |

|                                              |             |
|----------------------------------------------|-------------|
| Nefiracetam (Translon)                       | 1.006021074 |
| GDC-0941                                     | 1.005517689 |
| GSK1059615                                   | 1.005025126 |
| YO-01027                                     | 1.004065041 |
| Glimepiride                                  | 1.003613369 |
| Azelnidipine                                 | 1.003512293 |
| Cleviprex (Clevudipine)                      | 1.001003512 |
| BS-181 HCl                                   | 1.000295596 |
| ZM 336372                                    | 1           |
| SB590885                                     | 0.999063545 |
| Alogliptin (SYR-322)                         | 0.998193315 |
| Triamterene                                  | 0.995985951 |
| Saxagliptin (BMS-477118,Onglyza)             | 0.994579946 |
| AEBSF HCl                                    | 0.990966576 |
| RAF265 (CHIR-265)                            | 0.990030675 |
| Gabapentin HCl                               | 0.987957852 |
| Gabapentin (Neurontin)                       | 0.987957852 |
| Tetracaine HCl (Pontocaine)                  | 0.984445559 |
| Valproic acid sodium salt (Sodium valproate) | 0.983943803 |
| Brivanib alaninate (BMS-582664)              | 0.98336579  |
| ML133 HCl                                    | 0.981936779 |
| AZD5438                                      | 0.981003344 |
| Ambroxol HCl                                 | 0.979929754 |
| DCC-2036 (Rebastinib)                        | 0.979531773 |
| Z-VAD-FMK                                    | 0.97696477  |
| Ibutilide fumarate                           | 0.976417461 |
| Phenytoin (Lepitoin)                         | 0.975413949 |
| Ginkgolide A                                 | 0.974410437 |
| PHA-680632                                   | 0.974283181 |
| Amiloride HCl dihydrate                      | 0.97390868  |
| MK-0752                                      | 0.973803071 |
| Strontium ranelate (Protelos)                | 0.972905168 |
| Tolbutamide                                  | 0.972905168 |
| Lamotrigine                                  | 0.972905168 |
| Amlodipine besylate (Norvasc)                | 0.972403412 |
| TRAM-34                                      | 0.9713999   |
| Linagliptin (BI-1356)                        | 0.970189702 |
| Lopinavir (ABT-378)                          | 0.96928636  |
| WZ3146                                       | 0.96689329  |
| (R)-baclofen                                 | 0.966884094 |
| Oxcarbazepine                                | 0.965378826 |
| Manidipine 2HCl (CV-4093)                    | 0.965378826 |
| Propafenone (Rytmonorm) HCl                  | 0.965378826 |
| TGX-221                                      | 0.964824121 |
| Cilnidipine                                  | 0.963873557 |
| Danoprevir                                   | 0.963414634 |
| GDC-0879                                     | 0.962615031 |
| PF-03814735                                  | 0.961471572 |
| MLN8237 (Alisertib)                          | 0.961376177 |
| Ouabain                                      | 0.961364777 |

|                                   |             |
|-----------------------------------|-------------|
| Flunarizine 2HCl                  | 0.960863021 |
| BI 2536                           | 0.959996754 |
| Rufinamide (Banzel)               | 0.959357752 |
| Everolimus (RAD001)               | 0.95658877  |
| Daclatasvir (BMS-790052)          | 0.956187895 |
| Carbamazepine (Carbatrol)         | 0.955845459 |
| Mitiglinide calcium               | 0.955343703 |
| Mubritinib (TAK 165)              | 0.954916388 |
| Procaine (Novocaine) HCl          | 0.954841947 |
| Dibucaine (Cinchocaine) HCl       | 0.954340191 |
| Z-FA-FMK                          | 0.953929539 |
| Nilvadipine (ARC029)              | 0.95183141  |
| CP-724714                         | 0.951078924 |
| Brivanib (BMS-540215)             | 0.950503083 |
| SNS-032 (BMS-387032)              | 0.950340798 |
| Riluzole (Rilutek)                | 0.949322629 |
| Proparacaine HCl                  | 0.949322629 |
| BIBF1120 (Vargatef)               | 0.948474521 |
| Manidipine (Manyper)              | 0.947315605 |
| BKM120 (NVP-BKM120)               | 0.944749164 |
| Rotundine                         | 0.944305068 |
| Nitrendipine                      | 0.943803312 |
| JNJ-38877605                      | 0.941415125 |
| MK-5108 (VX-689)                  | 0.941142638 |
| Etomidate                         | 0.940291019 |
| Semagacestat (LY450139)           | 0.939476061 |
| Tetrandrine (Fanchinine)          | 0.939287506 |
| Gliquidone                        | 0.939287506 |
| TAK-733                           | 0.938996656 |
| Felodipine (Plendil)              | 0.936778726 |
| Aspirin (Acetylsalicylic acid)    | 0.934507678 |
| Sorafenib (Nexavar)               | 0.934193444 |
| MLN2238                           | 0.933604336 |
| Ritonavir                         | 0.933152665 |
| AZD7762                           | 0.933047591 |
| Neratinib (HKI-272)               | 0.932751995 |
| DAPT (GSI-IX)                     | 0.932700994 |
| Aurora A Inhibitor I              | 0.929796039 |
| Nafamostat mesylate               | 0.928635953 |
| Isradipine (Dynacirc)             | 0.928248871 |
| SP600125                          | 0.928022465 |
| A66                               | 0.920668896 |
| Nelfinavir Mesylate               | 0.920505872 |
| Ranolazine 2HCl                   | 0.915203211 |
| PAC-1                             | 0.914634146 |
| Masitinib (AB1010)                | 0.914556962 |
| Sitagliptin phosphate monohydrate | 0.913279133 |
| Camostat Mesilate (FOY-305)       | 0.91237579  |
| Chlorpromazine (Sonazine)         | 0.912192674 |
| BGJ398 (NVP-BGJ398)               | 0.911616908 |

|                                    |             |
|------------------------------------|-------------|
| BIRB 796 (Doramapimod)             | 0.911173515 |
| Flumazenil                         | 0.91018565  |
| Losmapimod (GW856553X)             | 0.90970092  |
| Vildagliptin (LAF-237)             | 0.906052394 |
| Atazanavir sulfate                 | 0.906052394 |
| Niflumic acid                      | 0.90366282  |
| SB-3CT                             | 0.902439024 |
| Amprenavir (Agenerase)             | 0.901535682 |
| AZ 960                             | 0.89993311  |
| Telaprevir (VX-950)                | 0.898373984 |
| RO4929097                          | 0.897922313 |
| Gabexate mesylate                  | 0.897470641 |
| PF-00562271                        | 0.897391304 |
| Doxycycline HCl                    | 0.895663957 |
| AS-605240                          | 0.895359149 |
| PI-1840                            | 0.889792231 |
| Tie2 kinase inhibitor              | 0.889742832 |
| MLN9708                            | 0.888888889 |
| PLX-4720                           | 0.888185654 |
| Alvelestat (AZD9668)               | 0.886178862 |
| Ruxolitinib (INCB018424)           | 0.882648537 |
| WP1130                             | 0.881471572 |
| PD 151746                          | 0.873532069 |
| CEP33779                           | 0.866564417 |
| GW5074                             | 0.865989264 |
| LY411575                           | 0.864498645 |
| AMG 900                            | 0.858595318 |
| A-769662                           | 0.858461538 |
| Refametinib (RDEA119, Bay 86-9766) | 0.856595092 |
| Bortezomib (Velcade)               | 0.855916893 |
| Odanacatib (MK 0822)               | 0.853658537 |
| Pimasertib (AS-703026)             | 0.851610429 |
| SB590885                           | 0.851418712 |
| PCI-32765 (Ibrutinib)              | 0.848561873 |
| TAK-901                            | 0.839063545 |
| PD153035 HCl                       | 0.832765336 |
| KU-55933                           | 0.826598507 |
| Apatinib (YN968D1)                 | 0.82541806  |
| MK-2461                            | 0.810966258 |
| Phenformin HCl                     | 0.810167224 |
| Flavopiridol HCl                   | 0.807625418 |
| BIX 02188                          | 0.806173313 |
| CX-4945 (Silmitasertib)            | 0.803210702 |
| GSK2126458                         | 0.802408027 |
| Barasertib (AZD1152-HQPA)          | 0.799902629 |
| Palomid 529                        | 0.799866221 |
| BI6727 (Volasertib)                | 0.799464883 |
| WYE-354                            | 0.793822051 |
| PH-797804                          | 0.784125767 |
| CAL-101 (GS-1101)                  | 0.783143813 |

|                                     |             |
|-------------------------------------|-------------|
| Triciribine (Triciribine phosphate) | 0.782781564 |
| BEZ235 (NVP-BEZ235)                 | 0.763794223 |
| Erlotinib HCl                       | 0.757951964 |
| BX-912                              | 0.756577003 |
| BMS-265246                          | 0.755690216 |
| BMS 777607                          | 0.742979604 |
| LY294002                            | 0.739208049 |
| ZM-447439                           | 0.73726063  |
| R406                                | 0.732842809 |
| LGX818                              | 0.732361963 |
| AZD8055                             | 0.724209282 |
| SB 216763                           | 0.72062642  |
| TAE684 (NVP-TAE684)                 | 0.72030185  |
| Indirubin                           | 0.711839465 |
| JNK Inhibitor IX                    | 0.709739264 |
| CCT128930                           | 0.707959866 |
| Crizotinib (PF-02341066)            | 0.704397923 |
| PF-04691502                         | 0.688160535 |
| AT9283                              | 0.686222006 |
| A-674563                            | 0.673311037 |
| OSI-930                             | 0.669819687 |
| PIK-75                              | 0.669671889 |
| WZ4002                              | 0.660360627 |
| PIK-294                             | 0.65993311  |
| Dabrafenib (GSK2118436)             | 0.659317485 |
| Quercetin (Sophoretin)              | 0.655652174 |
| CAY10505                            | 0.64        |
| NVP-TAE226                          | 0.639953988 |
| Raf265 derivative                   | 0.636120401 |
| AZD8330                             | 0.633313627 |
| MEK162 (ARRY-162, ARRY-438162)      | 0.627875767 |
| TAK-733                             | 0.619248466 |
| Danuserib (PHA-739358)              | 0.618873742 |
| Gefitinib (Iressa)                  | 0.618630315 |
| TAK-715                             | 0.612154908 |
| WZ8040                              | 0.605675436 |
| PF-05212384 (PKI-587)               | 0.602943144 |
| SNS-314                             | 0.589175592 |
| TG101348 (SAR302503)                | 0.575117057 |
| MK-2206 2HCl                        | 0.553716326 |
| TAK-285                             | 0.544670245 |
| CH5424802                           | 0.537960123 |
| OSI-027                             | 0.529899666 |
| BIX 02188                           | 0.52837718  |
| PIK-293                             | 0.526287625 |
| Sotrastaurin (AEB071)               | 0.523773006 |
| AS-604850                           | 0.521337793 |
| KX2-391                             | 0.519732441 |
| AS-252424                           | 0.502207358 |
| WHI-P154                            | 0.49827454  |



|                                                |             |
|------------------------------------------------|-------------|
| R935788 (Fostamatinib disodium, R788 disoc     | 0.496722408 |
| NU7441 (KU-57788)                              | 0.488294314 |
| XMD8-92                                        | 0.487921779 |
| JNK-IN-8                                       | 0.484279141 |
| Afatinib (BIBW2992)                            | 0.48369036  |
| TG101209                                       | 0.482541806 |
| Rapamycin (Sirolimus)                          | 0.470707562 |
| Arry-380                                       | 0.469431438 |
| BIX 02189                                      | 0.466449897 |
| OSI-420                                        | 0.461672241 |
| ARQ 197 (Tivantinib)                           | 0.457123746 |
| PP242                                          | 0.450167224 |
| BMS-599626 (AC480)                             | 0.449123661 |
| Imatinib Mesylate                              | 0.44287569  |
| Ku-0063794                                     | 0.43718593  |
| Foretinib (GSK1363089, XL880)                  | 0.416423239 |
| AT7867                                         | 0.410730121 |
| PD173074                                       | 0.407774165 |
| Selumetinib (AZD6244)                          | 0.40625     |
| Asiatic Acid                                   | 0.40625     |
| GDC-0879                                       | 0.404495294 |
| BMS 794833                                     | 0.4         |
| Dovitinib Dilactic acid (TKI258 Dilactic acid) | 0.399731595 |
| Pelitinib (EKB-569)                            | 0.396245936 |
| LY2603618 (IC-83)                              | 0.395585284 |
| TPCA-1                                         | 0.395513804 |
| Wortmannin                                     | 0.39493865  |
| Milciclib (PHA-848125)                         | 0.393177258 |
| SB 415286                                      | 0.387023411 |
| LY2228820                                      | 0.38649128  |
| GSK1904529A                                    | 0.38477767  |
| Regorafenib (BAY 73-4506)                      | 0.376884422 |
| Sorafenib                                      | 0.375       |
| Lapatinib Ditosylate (Tykerb)                  | 0.374472574 |
| U0126-EtOH                                     | 0.374424847 |
| GSK461364                                      | 0.373189477 |
| GSK690693                                      | 0.372444012 |
| ARRY334543                                     | 0.367759197 |
| Crenolanib (CP-868596)                         | 0.366956522 |
| Dovitinib (TKI-258)                            | 0.366764038 |
| Imatinib (Gleevec)                             | 0.359331104 |
| LY2784544                                      | 0.355158144 |
| PKI-402                                        | 0.353578595 |
| PH-797804                                      | 0.35277592  |
| BX-795                                         | 0.343777712 |
| AZD2014                                        | 0.333397239 |
| LY2228820                                      | 0.331096626 |
| Dacomitinib (PF299804,PF-00299804)             | 0.330301003 |
| NVP-ADW742                                     | 0.309964297 |
| PHA-665752                                     | 0.309802012 |

|                              |             |
|------------------------------|-------------|
| CEP-32496                    | 0.305981595 |
| ENMD-2076                    | 0.304611292 |
| R788 (Fostamatinib)          | 0.298595318 |
| CHIR-124                     | 0.288695652 |
| WYE-687                      | 0.288294314 |
| Ponatinib (AP24534)          | 0.286284363 |
| CCT137690                    | 0.283879599 |
| Staurosporine                | 0.274608336 |
| PP-121                       | 0.266354515 |
| AG-1478 (Tyrphostin AG-1478) | 0.256588629 |
| GSK1070916                   | 0.256187291 |
| WYE-125132                   | 0.256187291 |
| NVP-BHG712                   | 0.249364548 |
| NVP-BSK805                   | 0.242006689 |
| GSK1838705A                  | 0.240133779 |
| Enzastaurin (LY317615)       | 0.238964622 |
| Cediranib (AZD2171)          | 0.228334956 |
| LDN193189                    | 0.226755853 |
